1 **Define and visualize pathological architectures of human tissues from spatially resolved**  
2 **transcriptomics using deep learning**

3  
4 Yuzhou Chang<sup>1,\*</sup>, Fei He<sup>2,\*</sup>, Juexin Wang<sup>3,\*</sup>, Shuo Chen<sup>4</sup>, Jingyi Li<sup>2</sup>, Jixin Liu<sup>5</sup>, Yang Yu<sup>2</sup>, Li Su<sup>3</sup>,  
5 Anjun Ma<sup>1</sup>, Carter Allen<sup>1</sup>, Yu Lin<sup>6</sup>, Shaoli Sun<sup>7</sup>, Bingqiang Liu<sup>5</sup>, Jose Otero<sup>8</sup>, Dongjun Chung<sup>1,9</sup>,  
6 Hongjun Fu<sup>4</sup>, Zihai Li<sup>9,§</sup>, Dong Xu<sup>3,§</sup>, Qin Ma<sup>1,9,§</sup>

7  
8 <sup>1</sup> Department of Biomedical Informatics, The Ohio State University, Columbus, OH 43210, USA

9 <sup>2</sup> School of Information Science and Technology, Northeast Normal University, Changchun, Jilin  
10 130117, China

11 <sup>3</sup> Department of Electrical Engineering and Computer Science, and Christopher S. Bond Life  
12 Sciences Center, University of Missouri, Columbia, MO 65211, USA

13 <sup>4</sup> Department of Neuroscience, The Ohio State University, Columbus, OH 43210, USA

14 <sup>5</sup> School of Mathematics, Shandong University, Jinan 250100, China

15 <sup>6</sup> School of Artificial Intelligence, Jilin University, Changchun 130012, China

16 <sup>7</sup> Department of Pathology, The Ohio State University, Columbus, OH 43210, USA

17 <sup>8</sup> Departments of Neuroscience, Pathology, Neuropathology, The Ohio State University,  
18 Columbus, OH 43210, USA

19 <sup>9</sup> The Pelotonia Institute for Immuno-oncology, The Ohio State University Comprehensive Cancer  
20 Center, Columbus, OH 43210, USA

21

22 \* These authors contributed equally to the paper as first authors

23 § To whom correspondence should be addressed:

24 Dr. Zihai Li. Email: [zihai.li@osumc.edu](mailto:zihai.li@osumc.edu)

25 Dr. Dong Xu. Tel: (573)-882-2299; Email: [xudong@missouri.edu](mailto:xudong@missouri.edu)

26 Dr. Qin Ma. Tel: (706)-254-4293; Email: [qin.ma@osumc.edu](mailto:qin.ma@osumc.edu)

27

28 **Abstract**

29 Spatially resolved transcriptomics provides a new way to define spatial contexts and understand  
30 biological functions in complex diseases. Although some computational frameworks can  
31 characterize spatial context via various clustering methods, the detailed spatial architectures and  
32 functional zonation often cannot be revealed and localized due to the limited capacities of  
33 associating spatial information. We present RESEPT, a deep-learning framework for  
34 characterizing and visualizing tissue architecture from spatially resolved transcriptomics. Given

35 inputs as gene expression or RNA velocity, RESEPT learns a three-dimensional embedding with  
36 a spatial retained graph neural network from the spatial transcriptomics. The embedding is then  
37 visualized by mapping as color channels in an RGB image and segmented with a supervised  
38 convolutional neural network model. Based on a benchmark of sixteen 10x Genomics Visium  
39 spatial transcriptomics datasets on the human cortex, RESEPT infers and visualizes the tissue  
40 architecture accurately. It is noteworthy that, for the in-house AD samples, RESEPT can localize  
41 cortex layers and cell types based on a pre-defined region- or cell-type-specific genes and  
42 furthermore provide critical insights into the identification of amyloid-beta plaques in Alzheimer's  
43 disease. Interestingly, in a glioblastoma sample analysis, RESEPT distinguishes tumor-enriched,  
44 non-tumor, and regions of neuropil with infiltrating tumor cells in support of clinical and prognostic  
45 cancer applications.

46

## 47 **Introduction**

48 Tissue architecture is the biological foundation of spatial heterogeneity within complex organs like  
49 the human brain<sup>1</sup> and is thereby essential in understanding the underlying pathogenesis of human  
50 diseases, including cancer<sup>2</sup> and Alzheimer's disease (AD)<sup>3</sup>. Recent advances in spatially resolved  
51 technologies such as 10x Genomics Visium provide spatial context together with high-throughput  
52 gene expression for exploring tissue domains, cell types, cell-cell communications, and their  
53 biological consequences<sup>4</sup>. Some graph-based clustering methods<sup>5,6</sup>, statistical methods<sup>7</sup>, or deep  
54 learning-based methods<sup>8,9</sup> can identify spatial architecture and interpret spatial heterogeneity. For  
55 example, Seurat<sup>10</sup> and Giotto<sup>11</sup> use a similar framework on variable gene selection, dimension  
56 reduction, followed by graph-based clustering (i.e., Louvain). STUtility<sup>12</sup> uses non-negative matrix  
57 factorization to perform dimension reduction and then identifies tissue architecture based on the  
58 Seurat framework. SpaGCN<sup>9</sup> proposes a convolutional graph network to integrate gene  
59 expression, spatial location, and histology in spatial transcriptomics data analysis. stLearn<sup>8</sup> also  
60 integrates gene expression, spatial location, and histology information in the normalization  
61 method and applies the Louvain algorithm as a clustering method. Another approach,  
62 BayesSpace<sup>7</sup> adopts a Bayesian statistical framework to adjust spatial neighborhoods for  
63 resolution enhancement and for clustering analysis. Even existing methods can provide some  
64 useful information, the intrinsic tissue architecture, however, often cannot be fully revealed due to  
65 a lack of strong spatial representation for the biological context in tissues, and these tools often  
66 do not take full advantage of spatial information and are limited in predicting tissue architectures.  
67 Therefore, it is still challenging to accurately characterize tissue architectures and the underlying  
68 biological functions from spatial transcriptomics.

69  
70 We reasoned that spatial transcriptomics could be effectively represented and intuitively  
71 visualized as an image with expression abundance retaining the spatial context. To this end, we  
72 introduce **RESEPT** (**RE**constructing and **Segmenting Expression** mapped RGB images based on  
73 **s**patially resolved **T**ranscriptomics), a framework for reconstructing, visualizing, and segmenting  
74 an RGB image from spatial transcriptomics to reveal tissue architecture and spatial heterogeneity.  
75 We highlight the unique features of RESEPT as follows: (i) Spatial transcriptomics data are  
76 converted as an RGB image by mapping a low dimensional embedding to color channels via a  
77 spatial retained graph neural network. This image represents various spatial contexts together  
78 with expression abundance faithfully, and it resists robustly to noises due to limitations of  
79 measuring technology. (ii) An RGB image is segmented to predict spatial cell types using a pre-  
80 trained segmentation deep-learning model and an optional segmentation quality assessment  
81 protocol. (iii) RNA velocity can be integrated into image training, which is effective in revealing  
82 some tissue architectures. (iv) With a defined panel of gene sets representing specific biological  
83 pathways or cell lineages, RESEPT can recognize the spatial pattern and detect the  
84 corresponding active functional regions. (v) The functional zonation boundaries of AD are  
85 determined effectively by the pre-trained image segmentation deep-learning model. (vi) RESEPT  
86 successfully recognized tumor architecture, non-tumor architecture, and infiltration tumor  
87 architecture in clinical and prognostic applications on glioblastoma.

88

## 89 **Results**

### 90 **The architecture of RESEPT comprises representation learning and segmentation**

91 Spatial transcriptomics data are represented as a spatial spot-spot graph by RESEPT (**Fig. 1**).  
92 Each observational unit within a tissue sample containing a small number of cells, *i.e.*, “spot,” is  
93 modeled as a node. The measured gene expression values of the spot are treated as the node  
94 attributes, and the neighboring spots adjacent in the Euclidean space on the tissue slice are linked  
95 with an undirected edge. This lattice-like spot graph is modeled by our graph neural network  
96 (GNN) based tool scGNN<sup>13</sup>, which learns a three-dimensional embedding to preserve the  
97 topological relationship between all spots in the spatial space of transcriptomics. The three-  
98 dimensional embedding on gene expression is mapped to three color channels as Red, Green,  
99 and Blue in an RGB image, which is naturally visualized as an image of the spatial gene  
100 expression. Then a semantic segmentation can be performed on the image to identify the spatial

101 architecture by classifying each spot into a spatially specific segment with a supervised  
102 convolutional neural network (CNN) model.

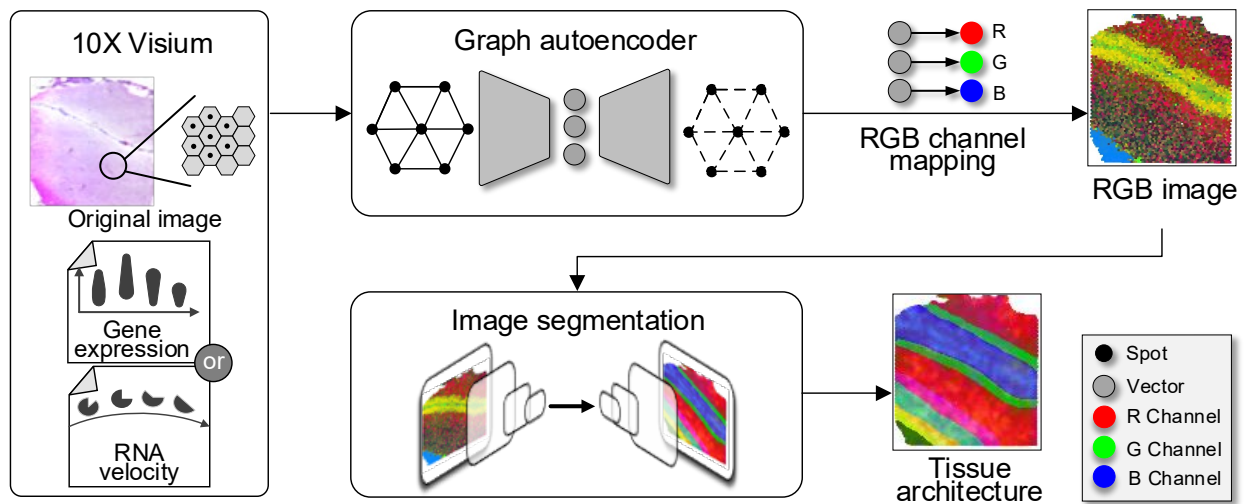

103  
104 **Fig. 1 | The RESEPT schema.** RESEPT takes gene expression or RNA velocity from spatial transcriptomics as the  
105 input. The input is embedded into a three-dimensional representation by a spatially constrained Graph Autoencoder,  
106 then linearly mapped to an RGB color spectrum to reconstruct an RGB image. A CNN image segmentation model is  
107 trained to obtain a spatially specific architecture (from whole-gene embedding) or spatial functional regions (from panel-  
108 gene embedding).

109 In the 10x Visium Genome platform, each spot has six adjacent spots, so the spatial retained spot  
110 graph has a fixed node degree six for all the nodes. On the generated spatial spot-spot graph, a  
111 graph autoencoder learns a node-wise three-dimensional representation to preserve topological  
112 relations in the graph. The encoder of the graph autoencoder composes two layers of graph  
113 convolution network (GCN) to learn the 3-dimensional graph embedding. The decoder of the  
114 graph autoencoder is defined as an inner product between the graph embedding, followed by  
115 sigmoid activation function. The goal of graph autoencoder learning is to minimize the difference  
116 between the input and the reconstructed graph (**Fig. 2a**).

117 The segmentation architecture is comprised of a backbone network, an encoder module, and a  
118 decoder module. The backbone network employs an extra deep network ResNet101<sup>14</sup> to provide  
119 basic visual features of the input RGB image. ResNet101 stacks one convolutional layer and 33  
120 residual blocks, each of which cascades 3 convolutional layers with a convolutional skip  
121 connection from the input signals to the output feature maps, for extracting sufficiently rich  
122 features. The encoder module utilizes atrous convolutional layers with various rates and sizes of  
123 filters and one global pooling layer respectively to detect multi-scale semantic features from  
124 ResNet101 feature maps. And the decoder module aligns the multi-scale features to the same

125 size and outputs a segmentation map classifying each spot into a specific spatial architecture.  
 126 (Fig. 2b)

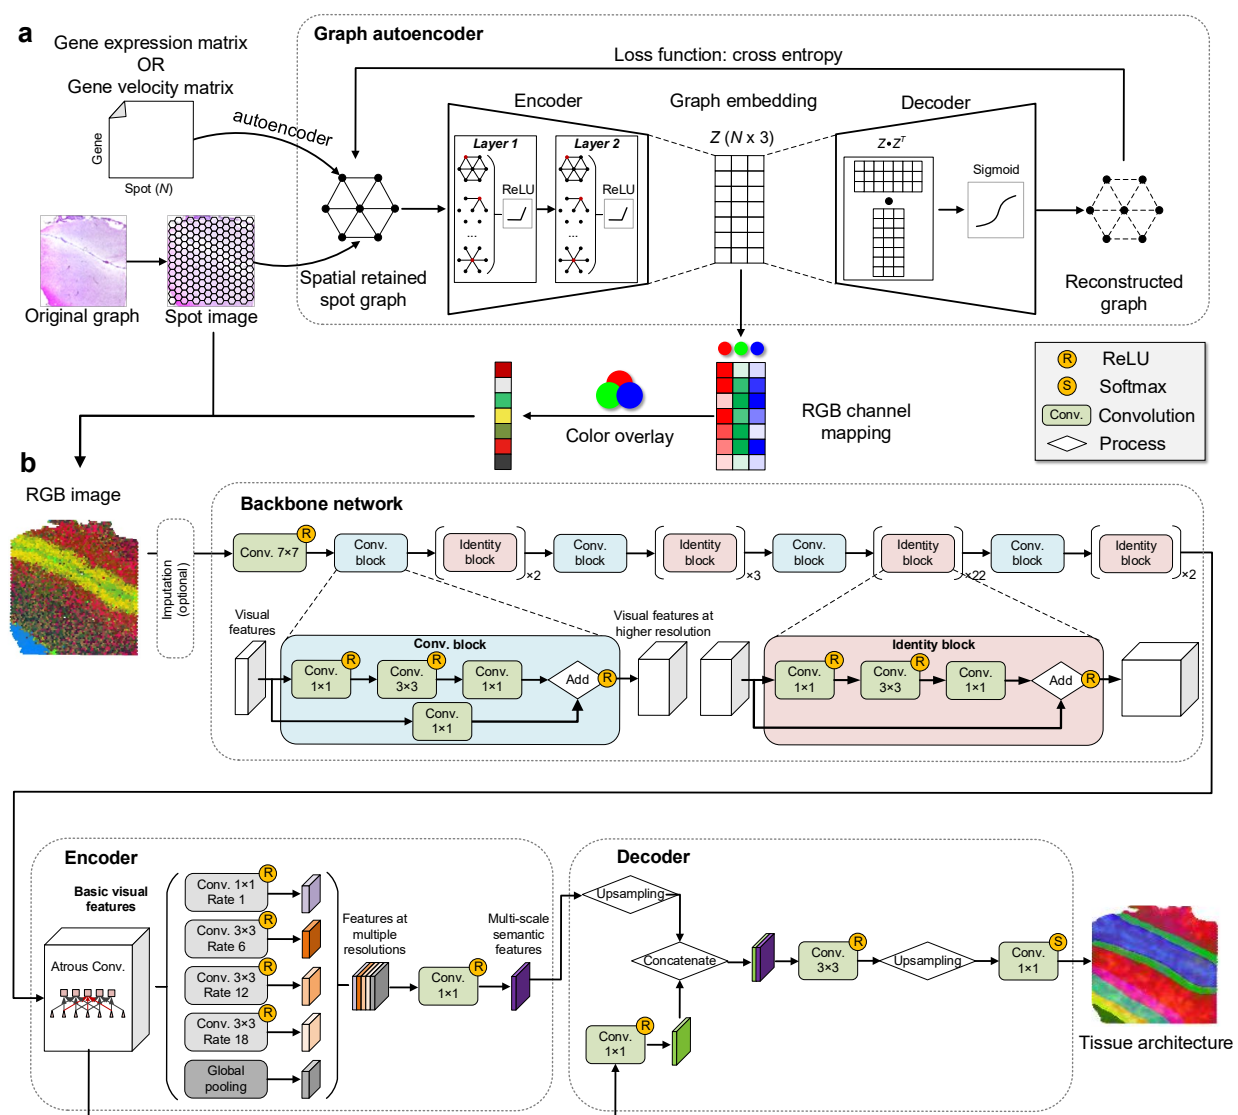

127  
 128 **Fig. 2 |The RESEPT framework.** (a) A spatial retained spot graph is established by spatial distances of spots and their  
 129 expression or velocity matrix. The graph autoencoder takes the adjacent distance matrix of the spot graph as the input.  
 130 Its encoder learns a 3-dimensional embedding of a spatial cell graph. The decoder reconstructs the adjacent  
 131 correlations among all cells by dot products of the 3-dimensional embeddings followed by a sigmoid activation function.  
 132 The graph autoencoder is trained by minimizing the cross-entropy loss between the input spatial and the reconstructed  
 133 graphs. The learned 3-dimensional embeddings are mapped to a full-color spectrum to generate an RGB image  
 134 revealing the spatial architecture. (b) The segmentation model takes the RGB image as the input, which may be  
 135 processed with an imputation operation if missing spots exist. Its backbone network ResNet101 consists of one  
 136 convolutional layer and a series of residual blocks, in which one type of residual block named convolutional block stacks  
 137 3 convolutional layers with a convolutional skip connection from the input signals to the output feature maps, and the  
 138 other type of residual block identity block stacks 3 convolutional layers with a direct skip connection from the input

139 signals to the output feature maps. This extra deep network firstly extracts rich visual features of the input image. The  
140 encoder module further extracts multi-scale semantic features by applying four atrous convolutional with different rates  
141 and sizes of filters and one global pooling layer respectively to the basic visual feature maps. And the decoder module  
142 up-samples the multi-scale features to the same size with basic visual feature maps and then concatenates them  
143 together. After a softmax activation function, the decoder module outputs a segmentation map classifying each spot  
144 into a specific spatial architecture.

### 145 **RESEPT accurately characterizes the spatial architecture of the human brain cortex region.**

146 Using manual annotations as the ground truth on 12 published samples<sup>15</sup> and four in-house  
147 samples<sup>16</sup> sequenced on the 10x Genomics Visium platform, RESEPT was benchmarked on both  
148 raw and normalized expression matrices of the 16 samples (S2-S17 in **Fig. 3a** and **Table 1**). Our  
149 results demonstrate RESEPT outperforms six existing tools, namely Seurat<sup>10</sup>, BayesSpace<sup>7</sup>,  
150 SpaGCN<sup>9</sup>, stLearn<sup>8</sup>, STUtility<sup>12</sup>, and Giotto<sup>11</sup> on tissue architecture identification in terms of  
151 Adjusted Rand Index (ARI)  $0.706 \pm 0.163$  (**Fig. 3b**) based on tuned parameters (**Supplementary**  
152 **Data 1**). Additional benchmarking results in default parameter settings with different evaluation  
153 matrices, visualization of RESEPT outcome, running time, and memory usage can be referred to  
154 **Fig. 3c**, **Supplementary Fig. 1**, and **Supplementary Data 2-3**. To validate the stability of our  
155 model, we generated simulation data with gradient decreasing sequencing depth based on two  
156 selected datasets S5 and S6 (**Fig. 3a**). The RGB images at low read depth presented more intra-  
157 regional diversity in their color distributions (**Supplementary Fig. 2** and **Supplementary Data 4**).  
158 In the downsampling read depth gradients from very low depth to full depth, RESEPT  
159 demonstrated its robustness by ARI  $0.454 \pm 0.014$  on S5, and ARI  $0.809 \pm 0.006$  on S6 (**Fig. 3d-**  
160 **g**). It is noteworthy that RGB images generated from RNA velocity<sup>17,18</sup> can reveal clear spatial  
161 separation between segments from the identified architecture on the AD sample S4 (Moran's I  
162  $0.920$  vs  $0.787$ ), which is consistent with the brain development zonation (**Fig. 3h**). On the same  
163 sample, RESEPT reveals better tissue architecture than the other tools in ARI  $0.409$  (**Fig. 3i**).  
164 More visualization results from different normalization methods can be referred to  
165 **Supplementary Fig. 1** and **Supplementary Data 5**. All the data used in the study are  
166 summarized in **Supplementary Table 1**, while datasets on 10x Genomics, Spatial  
167 Transcriptomics (ST), and High-Definition Spatial Transcriptomics (HDST) platforms without  
168 manual annotations were analyzed by RESEPT detailed in **Supplementary Fig. 3**.

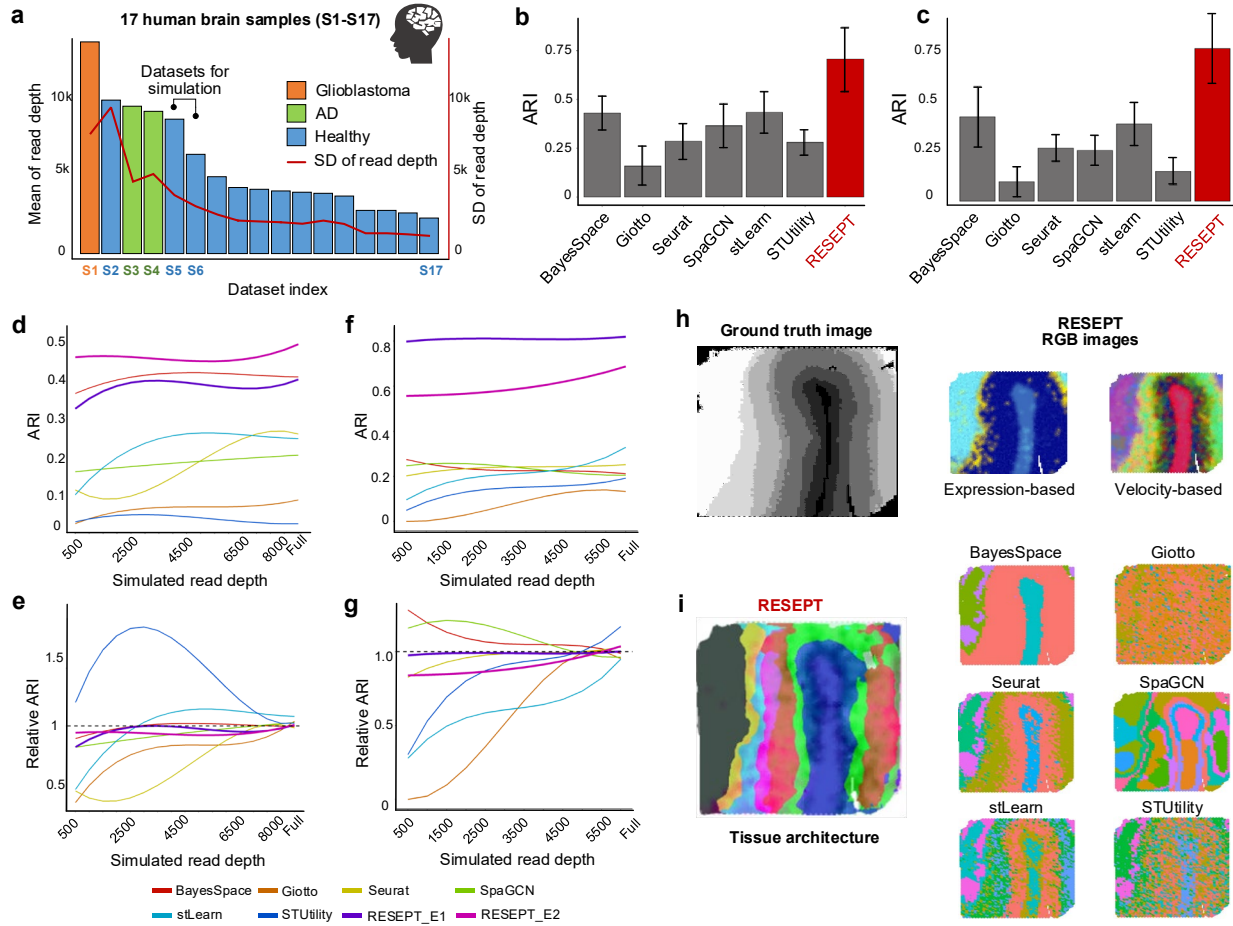

169  
 170 **Fig. 3** | The RESEPT workflow and performance. (a) show mean and standard deviation of sequencing reads of 17  
 171 human brain datasets on 10x Visium platform. S2-S17 have manual annotations as the benchmark, S5 & S6 for  
 172 simulation for high mean and low standard deviations of read depth, S1 & S4 for the case studies (more details in  
 173 Supplementary Tables 1-2). (b) Performance of tissue architecture (with 7 clusters pre-defined) identification by six  
 174 existing tools and RESEPT on criteria ARI. (c) Performance of tissue architecture (default parameters) identification by  
 175 six existing tools and RESEPT on criteria ARI. (d) Stability of tissue architecture identification across sequencing  
 176 depths on samples S5 using different tools. The Y-axis shows ARI performance, and the X-axis represents the  
 177 sequencing depth with subsampling. The lines are smoothed by the B-Spline smooth method. (e) Normalized  
 178 performance vs. sequencing depth on sample S5. Performance of full sequencing depth is set as 1.0. RESEPT\_E1  
 179 using scGNN embedding, RESEPT\_E2 using spaGCN embedding. (f) and (g) show the stability of ARI and normalized  
 180 performance against grid sequencing depth for sample S6. (h) RGB image generated from RNA velocity reveals better  
 181 architecture (Moran's  $I = 0.920$ ) than gene expression (Moran's  $I = 0.787$ ) on the AD sample S4. (i) Spatial domains on  
 182 S4 detected by RESEPT, together with those identified by other tools.

183  
 184 RESEPT benefits from the representation power of the learned embedding from the spatially  
 185 constrained GNN comparing with spaGCN and UMAP (**Supplementary Figs. 4-5**). The  
 186 sufficiently diverse training images (**Supplementary Fig. 6**) and fine-gained visual features

187 extracted from the extra deep CNN network also give strong discerning power to our  
188 segmentation model. We also validated the performance improvement with an increasing number  
189 of annotated training data (**Supplementary Fig. 7**). This improvement implied that as more  
190 annotated spatial transcriptomic data comes out, RESEPT will enhance its robustness  
191 accordingly.

192

### 193 **RESEPT interprets and discovers spatially related biological insights in AD**

194 With our in-house AD brain samples<sup>16</sup>, human postmortem middle temporal gyrus (MTG) from an  
195 AD case (Sample S4) was spatially profiled on the 10x Visium platform, and RESEPT successfully  
196 identified the main architecture of the MTG comparing with the manual annotation as the ground  
197 truth (S3 ARI = 0.474; S4 ARI=0.409). With the RGB image generated from specific gene  
198 expression, we distinguish cortical layers 2 & 3 from other layers and identified regions enriched  
199 with excitatory neurons and amyloid-beta (A $\beta$ ) plaques. For the AD sample on cortical layers 2 &  
200 3 (ground truth<sup>16</sup> as **Fig. 4a-b**), well-defined marker genes (C1QL2, RASGRF2, CARTPT, WFS1,  
201 HPCAL1 for layer 2, and CARTPT, MFGE8, PRSS12, SV2C, HPCAL1 for layer 3) from the  
202 previous study<sup>19</sup> were embedded and transformed to an RGB image instead of using whole  
203 transcriptomes (a full gene list in **Supplementary Table 2**). To validate the spatial specificity,  
204 module scores from Seurat<sup>10</sup> showed that these marker genes are statistically significantly  
205 enriched only on cortex layers 2 & 3 among all the layers ( $p < 0.0001$  by Wilcoxon signed-  
206 rank test). Furthermore, RESEPT visually provided consistent colors for cortical layers 2 & 3.  
207 These spatial patterns were strengthened by filtering unrelated colors. More RGB images from  
208 other layer-specific marker genes can be found in **Supplementary Fig. 8**. To reveal critical cell-  
209 type distribution (*i.e.*, excitatory neuron) associated with selective neuronal vulnerability in AD<sup>20</sup>,  
210 five well-defined excitatory neuron marker genes (SLC17A6, SLC17A7, NRG1, CAMK2A, and  
211 SATB2) in the cortex were obtained from our in-house database scREAD<sup>21</sup> (other cell-type marker  
212 genes in **Supplementary Table 2**). The module score and optimized RGB image (**Fig. 4c-d**)  
213 showed statistically significant enrichment of excitatory neuron marker genes in cortical layers 2-  
214 6 ( $p < 0.0001$  by Wilcoxon signed-rank test), and the original and improved RGB image also  
215 localized the excitatory neurons (other cell types can be found in **Supplementary Fig. 9**).  
216 Moreover, the RGB image can reflect an important AD pathology-associated region, *i.e.*, A $\beta$   
217 plaques-accumulated region. We conducted an immunofluorescence staining of A $\beta$  on the  
218 adjacent AD brain section (see details in **Methods**) and identified the brain region with A $\beta$   
219 plaques<sup>16</sup> (**Fig. 4e**). Among the gene module containing 57 A $\beta$  plaque-induced genes discovered  
220 from the previous study<sup>2</sup>, we validated those 20 upregulated genes showed the specific



221 enrichment in the A $\beta$  region compared to the non-A $\beta$  region in terms of layers 2 & 3 ( $p < 0.0001$  by  
222 Wilcoxon signed-rank test, **Fig. 4f**). By comparing the color in A $\beta$  region-associated spots with  
223 the RGB image (**Fig. 4g**), we observed A $\beta$  region-associated spots behaved a consistent color in  
224 layers 2 & 3. To evaluate RGB value variation quantitatively, we investigated the value range of  
225 channels R, G, and B for the A $\beta$  region and non-A $\beta$  region (**Fig. 4h**). The result showed that the  
226 A $\beta$  region had a tight dispersion compared to the non-A $\beta$  region, which proved the RGB image  
227 can be potentially used to indicate the pathological regions with A $\beta$  plaques. Overall, with the  
228 evidence of images generated from hallmark panel genes, RESEPT can confidently reflect layer-  
229 specific, cell-type-specific, and pathological region-specific architecture, with well-studied marker  
230 genes and disease-associated genes. These results indicate significant potentials and strong  
231 applicative power of RESEPT to localize and present important spatial architecture contributing  
232 to AD pathology.

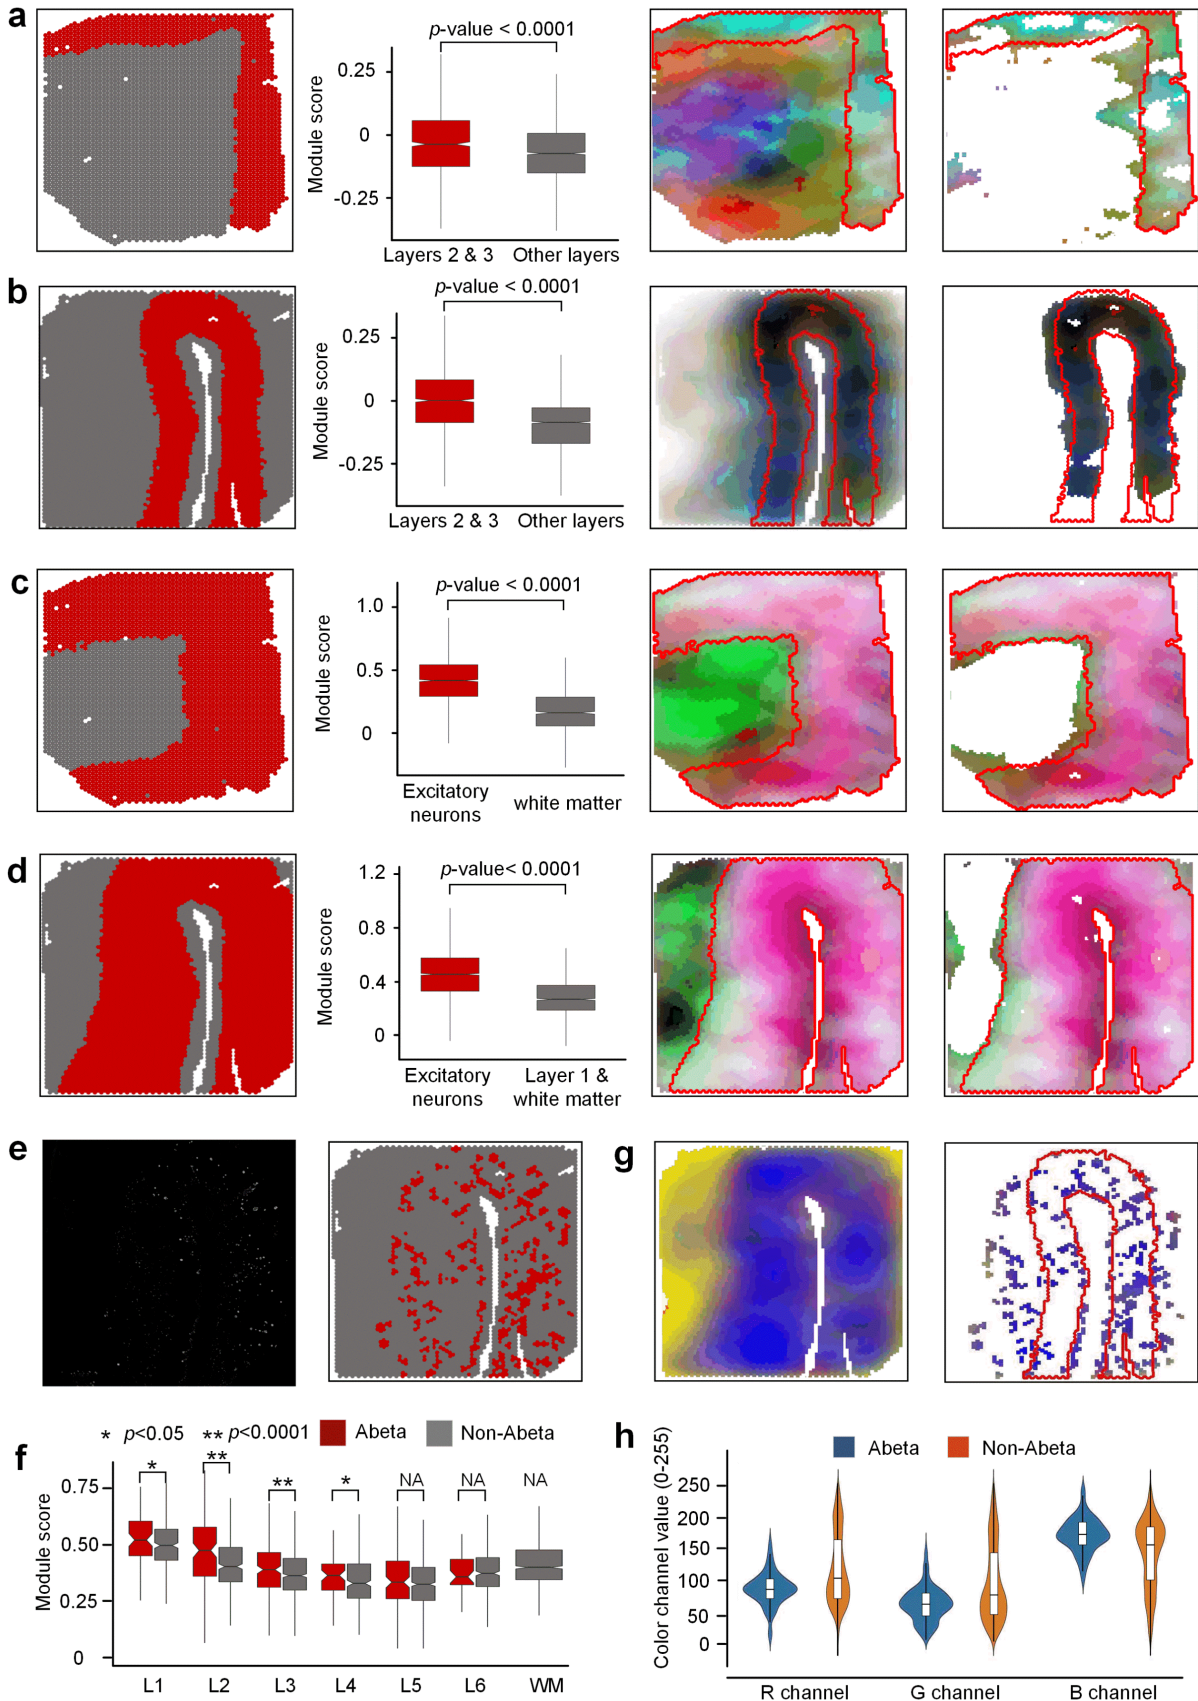

234 **Fig. 4** | RESEPT identifies spatial cellular patterns in the human postmortem middle temporal gyrus (MTG). (a) The  
235 box plot shows the module score of the cortical layers 2 and 3 and other layers from Sample S3, where the x-axis  
236 shows layer categories and the y-axis represents scores. The second figure shows layer 2 and 3 architecture (red); the  
237 third figure shows an RGB image; the fourth figure is reconstructed by filtering out unrelated colors. (b) The box plot  
238 shows the module score of excitatory neurons from layers 2 to 6 and other layers. The second figure shows the ground  
239 truth of layers 2 to 6; the third figure shows an RGB image; the fourth figure is reconstructed by filtering out unrelated  
240 colors. (c) and (d) display the same layer architecture and cell type localization for sample S4. (e) The left figure was  
241 generated by immunofluorescence assay to show A $\beta$  plaques location, and the right figure highlights the spots with the  
242 accumulation of A $\beta$  plaques. (f) The box plot shows scores for the A $\beta$  region and the non-A $\beta$  region split by six layers  
243 and white matter. (g) The left figure shows the RGB image from the 20 genes embedding results, and the right figure  
244 shows the RGB image cropped according to the A $\beta$  region and marked by layers 2&3 (encircled by the red line). (h)  
245 RGB channel shows the color value dispersion, where blue represents RGB values in the A $\beta$  region and orange  
246 represents RGB values in the non-A $\beta$  region.

247

#### 248 **The clinical and prognostic applications of RESEPT in cancer.**

249 To demonstrate the clinical and prognostic applications of RESEPT in the oncology field, we  
250 analyzed a glioblastoma dataset published by 10x Genomics using the Visium platform (**Fig. 5a**,  
251 Sample S1). Glioblastoma, a grade IV astrocytic tumor with a median overall survival of 15  
252 months<sup>22</sup>, is characterized by heterogeneity in tissue morphologies which range from highly dense  
253 tumor cellularity with necrosis to other areas with single tumor cell permeation throughout the  
254 neuropil. Assessment of tissue architecture represents a key diagnostic tool for patient prognosis  
255 and diagnosis. RESEPT identified eight segments (**Fig. 5b-c**, **Supplementary Fig. 10**) and  
256 distinguished tumor-enriched, non-tumor, and regions of neuropil with infiltrating glioblastoma  
257 cells. These segmented areas show similarities to secondary structures of Scherer<sup>23</sup>. Based on  
258 the morphological features of Segment 3 in the Hematoxylin-Eosin (H&E) image (**Fig. 5c**), we  
259 observed cells with large cytoplasm and nuclei with prominent nucleoli, a morphology consistent  
260 with cortical pyramidal neurons, and many tumor cells located in this segment showing neuronal  
261 satellitosis. Differentially expressed gene (DEG) analysis demonstrated that a pre-defined  
262 glioblastoma marker CHI3L1<sup>24,25</sup> was highly expressed in most of the spots in Segment 3 (**Fig.**  
263 **5d, differentially expressed gene of each segment can be found Supplementary Data 6**). By  
264 exploring the H&E image of Segment 6, we found this prominent area of the segment with  
265 erythrocytes, likely representing an area of acute hemorrhage during the surgical biopsy. This  
266 morphological observation was in line with the GO enrichment analysis, where DEGs were  
267 enriched in blood functionality pathways (**Fig. 5e**). Most interestingly, from the morphological  
268 features of Segment 7, we observed that this segment belongs to infiltrating glioblastoma cells  
269 characterized by elongate nuclei admixed with non-neoplastic brain cells. Glioblastoma cells

270 showing elongated nuclei are characteristic of invasion along white matter tracts<sup>23</sup>. Comparing  
 271 DEGs with pre-defined infiltrating markers<sup>26</sup>, we found that infiltrating tumor marker genes KCNN3  
 272 and CNTN1 were expressed specifically in Segment 7 (**Fig. 5f**). Overall, RESEPT successfully  
 273 recognized tumor architecture, non-tumor architecture, and infiltration tumor architecture. This  
 274 tool augments the morphological evaluation of glioblastoma by enabling an improved  
 275 understanding of glioblastoma heterogeneity. This objective characterization of the heterogeneity  
 276 will ultimately improve oncological treatment planning for patients.

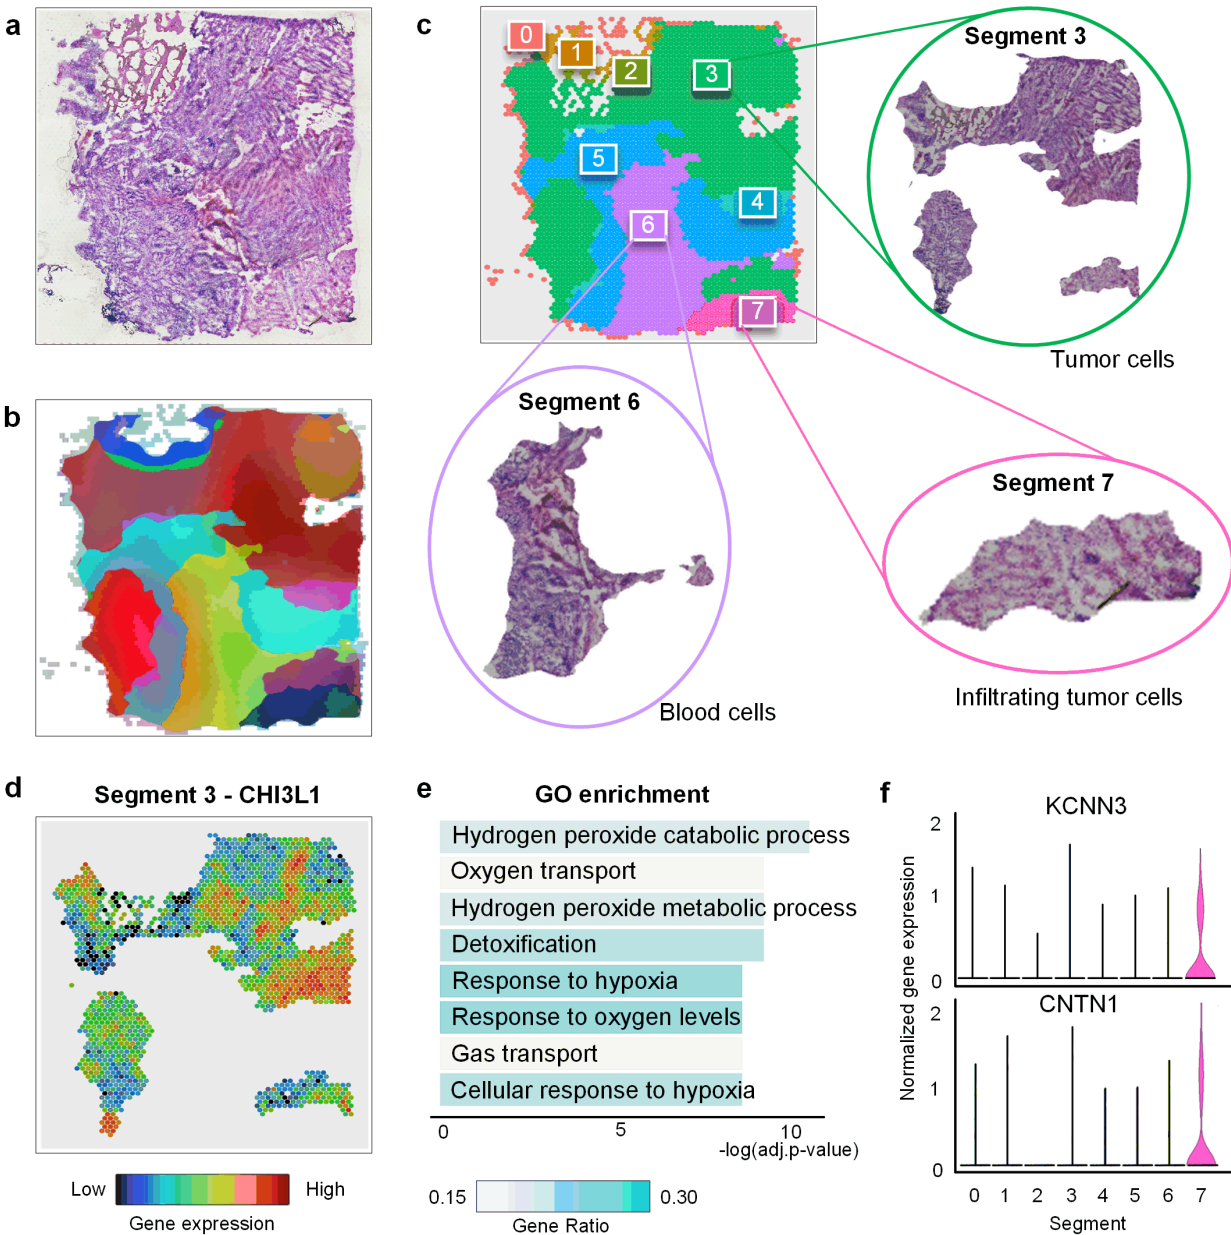

277  
 278 **Fig. 5 |** RESEPT identifies tumor regions in glioblastoma samples (Sample S1). (a) Original H&E staining image from  
 279 the 10x Genomics. (b) RGB image generated from the RESEPT pipeline. (c) Labeled segmentation by RESEPT and

280 Segments 3, 6, and 7 are cropped according to the segmentation result. Based on morphological features, our  
281 physiologist found Segment 3 contains large tumors from morphological features; Segment 6 contains a large number  
282 of blood cells; Segment 7 contains infiltrating tumor cells. (d) Glioblastoma marker gene CHI3L1 is highly and broadly  
283 expressed in Segment 3 based on the logCPM normalization value. (e) Bar plot shows the results of GO enrichment  
284 analysis, indicating Segment 6 having a large proportion of blood cells with blood signature genes for gas transport. (f)  
285 Infiltrating glioblastoma signature marker genes KCNN3 and CNTN1 are highly expressed in Segment 7 based on the  
286 logCPM normalization.

287

## 288 **Conclusion and Discussion**

289 Our results show RESEPT is a robust and high-performance tool, for spatial transcriptomics data  
290 analysis, visualization, and interpretation. Powered by representation learning with graph neural  
291 networks in a spatial spot-spot graph model, the spatial transcriptomics is visualized as an RGB  
292 image. RESEPT formulates the problem as image segmentation and uses a deep-learning model  
293 to detect the tissue architecture. It has the potential to provide specific spatial architectures in  
294 broader applications, including neuroscience, immuno-oncology, and developmental biology.

295

296 RESEPT allows taking one of the two types of input, gene expression or RNA velocity. An RGB  
297 image generated from RNA velocity may have a different biological meaning from gene  
298 expression but is appropriate for some contexts, such as well-differentiated architectures in the  
299 spatial slice. For example, our study suggests well-structured brain cortical datasets like AD  
300 samples may have better performance in RNA velocity as input than gene expression. We will  
301 investigate the guideline on how and when to choose RNA velocity as the input instead of gene  
302 expression.

303

304 Besides RGB channels as the default setting, RESEPT can be adjusted to most mixing color  
305 pallets in graphic design, such as CMYK (Cyan, Magenta, Yellow, and black), HSV (Hue,  
306 Saturation, and Value), and hexadecimal colors. These alternative color systems may provide a  
307 broader color spectrum and enough variation in hue and brightness to present complex  
308 embedding. With these styles of visualization layouts as options, tissue architectures might be  
309 more accessible and distinguishable in some cases.

310

311 In the future, RESEPT will expand the methodology from lattice-based sequencing technologies  
312 including 10x and ST platform to fluorescence *in situ* hybridization (FISH) technologies, such as  
313 seqFISH and multiplexed error-robust FISH. With the availability of spatial multi-omics, RESEPT

314 will also integrate other modals of information as histology image pixels together with the spatial  
315 coordinates and gene expression.

316  
317 Meanwhile, RESEPT will be colorblind accessible with a 'colorblind safe' mode in visualization, in  
318 which all output images will be replaced with predefined color-blind palettes to avoid problematic  
319 color combinations. For different types of color blindness, RESEPT will offer corresponding  
320 narrow-down palettes accordingly. In addition, different patterns/labels instead of colors can be  
321 mapped in the image to distinguish among clusters.

322

## 323 **Methods**

### 324 **1. RESEPT pipeline**

325 RESEPT is implemented in two major steps: (i) reconstruction of an RGB image of spots using  
326 gene expression or RNA velocity from spatial transcriptomics sequencing data; (ii) implementation  
327 of a pre-trained image segmentation deep-learning model to recognize the boundary of specific  
328 spatial domains and to perform functional zonation. **Fig. 1** and **Fig. 2** demonstrate the pipeline  
329 with conceptual description and technical details, respectively.

330

#### 331 **1.1 Construct RGB image for spatial transcriptomics**

332 An RGB image is constructed to reveal the spatial architecture of a tissue slice using three-  
333 dimensional embedding as the primary color channels. Besides gene expression, RESEPT can  
334 accept RNA velocity<sup>17</sup> as the input. RNA velocity unveils the dynamics of RNA expression at a  
335 given time by distinguishing the ratio of unspliced and spliced mRNAs, reflecting the kinetics and  
336 potential influences of transcriptional regulations in the present to the future cell state. The original  
337 BAM file of human studies is often unavailable to public users due to ethical reasons, and hence,  
338 in most cases, we only refer to expression-derived RGB images in our study. The scGNN<sup>13</sup>  
339 package is used to generate spatial embeddings for each spot based on the pre-processed  
340 expression matrix or RNA velocity matrix along with the corresponding meta-data. In practice,  
341 RESEPT can adapt any type of low dimensional representations, such as embedding from UMAP  
342 and spaGCN<sup>9</sup>. On benchmarks, scGNN embedding obtained better results in most cases, so  
343 RESEPT uses scGNN in default (**Supplementary Fig. 8**).

344 *Dimensional Reduction.* After log-transformed and normalized library size by CPM, the spatial  
345 transcriptome expression or raw RNA velocity as the input is dimensionally reduced by learning  
346 a low dimensional embedding through an autoencoder. Both the encoder and the decoder consist

347 of two symmetrically stacked layers of dense networks followed by the ReLU activation function.  
348 The encoder learns embedding  $X'$  from the input matrix  $X$ , and the encoder reconstructs the  
349 matrix  $\hat{X}$  from the  $X$ , where  $X$  can be either gene expression or RNA velocity. Thus,  $X, \hat{X} \in \mathbb{R}^{N \times M}$   
350 and  $X' \in \mathbb{R}^{N \times M'}$ , where  $M$  is the number of input genes from the spatial transcriptome,  $M'$  is the  
351 dimension of the learned embedding, and  $M' < M$ .  $N$  is the number of spots of the spatial slide.  
352 The objective of the training is to achieve a maximum similarity between the original and  
353 reconstructed matrices through minimizing the mean squared error (**MSE**)  $\sum (X - \hat{X})^2$  as the loss  
354 function. Positional encoding<sup>27</sup> using Euclidean distance between spots on the tissue slice is also  
355 incorporated in reconstructing the input matrix.

356 *Generating Spatial retained Spot Graph.* The cell graph is a powerful mathematical model to  
357 formulate cell-cell relationships based on similarities between cells. In single-cell RNA sequencing  
358 (scRNA-seq) data without spatial information, the classical K-Nearest-Neighbor (KNN) graph is  
359 widely applied to construct such a cell-cell similarity network in which nodes are individual cells,  
360 and the edges are relationships between cells in the gene expression space. With the availability  
361 of spatial information in spots as the unit of observation arranged on the tissue slice, our in-house  
362 tool scGNN adopts spatial relation in Euclidean distance as the intrinsic edge in a spot-spot graph.  
363 Each spot in the spatial transcriptomics data contains one or more cells, and the captured  
364 expression or the calculated RNA velocity is the summarization of these cells within the spot. Only  
365 directly adjacent spots in contact in the 2D spatial plane have edges between them, and hence,  
366 the lattice of the spatial spots comprises the spatial spot graph. For the generated spot graph  $G =$   
367  $(V, E)$ ,  $N = |V|$  denoting the number of spots and  $E$  representing the edges connecting with  
368 adjacent neighbors.  $A$  is its adjacency matrix and  $D$  is its degree matrix, *i.e.*, the diagonal matrix  
369 of number of edges attached to each node. The node feature matrix is the learned embedding  $X'$   
370 from the dimensional reduction autoencoder. In the 10x Visium platform, each spot has six  
371 adjacent spots, so the spatial retained spot graph has a fixed node degree of six for all the nodes.  
372 Similar to the KNN graph derived from scRNA-seq, each node in the graph contains  $M'$  attributes.

373 *Graph autoencoder.* Given the generated spatial spot-spot graph, a graph autoencoder learns a  
374 node-wise three-dimensional representation to preserve topological relations in the graph. The  
375 encoder of the graph autoencoder composes two layers of graph convolution network (GCN) to  
376 learn the low dimensional graph embedding  $Z$  in Eq. (1).

$$\begin{aligned} Z &= GCN(GCN(X', A), A) \\ GCN(X', A) &= ReLU(\hat{A}X'W) \end{aligned} \tag{1}$$

378 where  $\tilde{A} = D^{-1/2}AD^{-1/2}$  is the symmetrically normalized adjacency matrix and  $W$  is a weight  
379 matrix learned from the training. The output dimensions of the first and second layers are set as  
380 32 and 3, according to the 3 color channels as RGB, respectively. The learning rate is set at  
381 0.001.

382 The decoder of the graph autoencoder is defined as an inner product between the graph  
383 embedding  $Z$ , followed by a sigmoid activation function:

$$384 \quad \hat{A} = \text{sigmoid}(ZZ^T) \quad (2)$$

385 where  $\hat{A}$  is the reconstructed adjacency matrix of  $A$ .

386 The goal of graph autoencoder learning is to minimize the cross-entropy  $L$  between the input  
387 adjacency matrix  $A$  and the reconstructed matrix  $\hat{A}$ .

$$388 \quad L(A, \hat{A}) = -\frac{1}{N \times N} \sum_{i=1}^N \sum_{j=1}^N (a_{ij} * \log(\hat{a}_{ij}) + (1 - a_{ij}) * \log(1 - \hat{a}_{ij})) \quad (3)$$

389 where  $a_{ij}$  and  $\hat{a}_{ij}$  are the elements of adjacency matrix  $A$  and  $\hat{A}$ ,  $1 \leq i \leq N, 1 \leq j \leq N$ . As there  
390 are  $N$  nodes as the number of spots in the slide,  $N \times N$  is the total number of elements in the  
391 adjacency matrix.

392 *Reconstruct RGB Image.* The learned embedding  $Z \in \mathbb{R}^{N \times 3}$  is capable of representing and  
393 preserving the underlying relationships in the modeled graph from spatial transcriptomics data.  
394 Meanwhile, the three-dimensional embedding can also be intuitively mapped to Red, Green, and  
395 Blue channels in the RGB space of the image. Normalized to an RGB color space accordingly to  
396 a full-color spectrum (pixel range from 0 to 255) as Eq. (4), the embedding of each spot is  
397 assigned a unique color for exhibiting the expression or velocity pattern in space.

$$398 \quad y_{i,j} = 255 \times \frac{Z_{i,j} - Z_{min}}{Z_{max} - Z_{min}} \quad (4)$$

399 where  $y \in \mathbb{R}^{N \times 3}$  and  $y_{i,j}$  is its transformed color of the  $i$ -th spot in the  $j$ -th channel,  $1 \leq i \leq N, j \in$   
400  $\{R, G, B\}$ .  $Z_{max}$  and  $Z_{min}$  represent the maximum and minimum of all embedding values in the  
401 RGB channels, respectively. With their coordinates and diameters at the full resolution provided  
402 from 10x Visium, we are able to plot all spots with their synthetic colors on a white drawing panel  
403 and reconstruct a full-size RGB image explicitly describing the spatial expression or velocity  
404 properties in the original spatial coordinate system. For the spatial transcriptomic data sequenced  
405 in lattice from other techniques as ST platform, RESEPT allows users to specify a diameter to  
406 capture appropriate relations between spots in the RGB image accordingly.



## 407 1.2 RGB image segmentation model

408 The RGB image makes the single-cell spatial architecture perceptible in human vision. With the  
409 constructed image, we treat the potential functional zonation partition as a semantic segmentation  
410 problem, which automatically classifies each pixel of the image into a spatially specific segment.  
411 Such predictive segments reveal the functional zonation of spatial architecture.

412

413 *Image segmentation model architecture.* We trained an image-segmentation model based on a  
414 deep architecture DeepLabv3+<sup>28,29</sup>, which includes a backbone network, an encoder module, and  
415 a decoder module (**Fig. 2**).

416 *Backbone network.* The backbone network provides dense visual feature maps for the following  
417 semantic extraction by any deep convolutional network. Here, ResNet-101<sup>30</sup> is selected as the  
418 underlying model for the backbone network, which consists of a convolutional layer with 64-  
419 channels in  $7 \times 7$  size of filters and 33 residual blocks, each of which stacks one convolutional  
420 layer with multi-channel (including 64, 128, 256, and 512) in  $3 \times 3$  size of filters and two  
421 convolutional layers with multi-channel (including 64, 128, 256, 512, 1024 and 2048)  $1 \times 1$  size of  
422 filters. The generated RGB image is mapped into a  $c$ -channel feature map by the first  
423 convolutional layer and gradually fed into the following residual blocks to produce rich visual  
424 feature maps for describing the image from different perspectives. Here,  $c$  equals 64. In each  
425 residual block, the feature map generated from the previous block  $y \in \mathbb{R}^{N \times 3}$  is updated to  $\hat{y} \in$   
426  $\mathbb{R}^{N \times c}$  in Eq. (5).

$$427 \quad \hat{y} = \begin{cases} F(y, W_i) + y & i = 1, 4, 8, 31 \\ F(y, W_i) + yW_{1 \times 1} & otherwise \end{cases} \quad (5)$$

428 where

- 429 ●  $F(*)$  is the activation function, and we use ReLU<sup>31</sup> in this study.
- 430 ●  $W_i$  represents the learning convolutional weights in the  $i^{\text{th}}$  block,  $1 \leq i \leq 33$ .
- 431 ●  $W_{1 \times 1}$  represents the learning weights of the convolutional layer with  $1 \times 1$  kernel size.

432 Element-wise addition operation  $F + y$  in Eq. (5) enables a direct shortcut to avoid the vanishing  
433 gradient problem in this deep network. In the 1<sup>st</sup>, 4<sup>th</sup>, 8<sup>th</sup>, and 31<sup>st</sup> blocks of the 33 residual blocks,  
434 their input and output dimensions do not match up due to different filter settings from their previous  
435 layers. Accordingly, the projection shortcut with an additional  $1 \times 1$  convolution in Eq. (5) is used  
436 to align dimensions in these blocks, which are also named identity blocks. The rest blocks stacked  
437 on the previous blocks with the same filter settings employ a direct shortcut. We leveraged

438 ResNet-101 as a basic visual feature provider and sent the most informative feature maps from  
439 the last convolutional layer before logits to the following encoder module.

440 *Encoder module.* The aim of the encoder module is to capture multi-scale contextual information  
441 based on the dense visual feature maps from the backbone. To achieve the multi-scale analysis,  
442 atrous convolution<sup>28</sup> is adopted in the encoder to extend the size of the respective field. For the  
443 generated RGB image with width  $m$  and length  $n$ , the total number of spots  $N = m \times n$ . Given the  
444 input signal from Eq. (5) as  $y \in \mathbb{R}^{m \times n \times c}$  with a  $c'$ -channel filter  $w \in \mathbb{R}^{K \times K \times c'}$ , the output feature  
445 signal  $y' \in \mathbb{R}^{m \times n \times c'}$  is defined as follows:

$$446 \quad y'^{[i,j]} = \sum_{k=0}^K y[i + r \times k, j + r \times k] w[k, k] \quad (6)$$

447 where

- 448 ●  $y[i, j]$  represents the input signal at the location  $(i, j)$  with  $c$ -channel values.  $0 \leq i \leq m, 0 \leq$   
449  $j \leq n$ .  $r$  is the stride rate in atrous convolution.
- 450 ●  $w[k, k]$  represents the convolutional weights with  $c'$ -channel values,  $0 \leq k \leq K$ .  $K$  is the  
451 kernel size of the convolutional filter.
- 452 ●  $y'[i, j]$  represents the output signal at the location  $(i, j)$  with  $c'$ -channel values.

453 Compared to the standard convolution, the atrous convolution samples the input signal  $y$  with the  
454 stride  $r$  rather than using direct neighbors inside the convolutional kernel. Therefore, the standard  
455 convolution is a special case of atrous convolution with  $r = 1$ . By using multiple rate value settings  
456 (rate = 1, 6, 12 and 18), we separately apply one standard convolutional layer with 256-channel  
457  $1 \times 1$  size of filters (i.e., the atrous convolutional layer with rate = 1), three atrous convolutional  
458 layers with 256-channel  $3 \times 3$  size of filters and an additional average pooling layer to produce  
459 high-level multi-scale features. These semantic features are then merged into the decoder  
460 module.

461 *Decoder module.* In the decoder, the input high-level features are bilinearly up-sampled and  
462 concatenated with the basic visual features for recovering the segment boundaries and spatial  
463 dimension. A standard convolutional layer with 256-channel  $3 \times 3$  size of filters is applied to  
464 outweigh the importance of the merged features and obtain sharper segmentation results.  
465 Eventually, an additional bilinear up-sampling operation forms the output of the decoder to a  
466  $m \times n \times 256$  matrix, where  $m$  and  $n$  denote the width and height of the input image, respectively.  
467 The following convolution layer with  $d$ -channel  $1 \times 1$  size of filters squeezes the feature matrix

468 along the channel axis to  $m \times n \times d$  shape, where  $d$  is the pre-defined maximum number of  
469 categories. The softmax<sup>32</sup> function is then applied to generate its predictive segmentation map,  
470 which takes a matrix with the same size of the input image recording the segment category of  
471 each pixel on it. The pixels falling into a certain category in the segmentation map point to a  
472 segmented spatial region. Our modeling objective is to minimize the cross-entropy<sup>33</sup> between the  
473 predictive segmentation map  $\hat{S}$  and labeled spatial functional regions  $S$ :

$$474 \quad L(S, \hat{S}) = -\frac{1}{m \times n} \sum_{i=1}^m \sum_{j=1}^n (s_{ij} * \log(\hat{s}_{ij}) + (1 - s_{ij}) * \log(1 - \hat{s}_{ij})) \quad (7)$$

475 where  $s_{ij}$  and  $\hat{s}_{ij}$  are the segment categories of the pixel at the  $i$ -th row and the  $j$ -th column for  
476 the input images with  $m \times n$  pixels.  $s_{ij} \in [1, d]$ ,  $\hat{s}_{ij} \in [1, d]$ .

477

478 *Training set data preparation.* We performed scGNN using various autoencoder dimensions  
479 ( $M' = 3, 10, 16, 32, 64, 128, \text{ and } 254$ ) and multiple positional encoding intensity parameters  
480 ( $PE\alpha = 0.1, 0.2, 0.3, 0.5, 1.0, 1.2, 1.5, \text{ and } 2.0$ ), resulting in 56 embeddings used to generate  
481 diverse RGB images for each sample in the training set (see image results on  
482 <https://github.com/OSU-BMML/RESEPT>). In this study, we performed 16-fold Jackknife cross-  
483 validation, each of which formed all but one observation as the training set. The one sample was  
484 left to evaluate the trained model in each fold.

485

486 *Model training.* We implemented the training procedure on the MMSegmentation platform<sup>34</sup>, which  
487 is an open-source semantic segmentation toolbox based on PyTorch. The weights of  
488 DeepLabv3+ were initialized by the pre-trained weights from the Cityscapes dataset provided by  
489 MMSegmentation. To introduce diversity to the training data and improve the generalization of  
490 our model, we applied transforms defined in MMSegmentation, including the random cropping,  
491 rotation and photometric distortions, to augment the training RGB images.  $400 \times 400$  sized  
492 patches are randomly cropped to provide different regions of interest from the whole RGB images.  
493 A random rotation (range from -180 degrees to 180 degrees) was further conducted to fit the  
494 potential irregular layout of spatial architectures. Some photometric distortions such as  
495 brightness, contrast, hue, and saturation changes were also utilized to training samples when  
496 loading to MMSegmentation. Stochastic gradient descent (SGD)<sup>35</sup> was chosen as the optimization  
497 algorithm, and its learning rate was set to 0.01. The training procedure iterated 30 epochs, and  
498 the checkpoint among all epochs with the best Moran's I autocorrelation index<sup>36</sup> on the testing  
499 data was selected as the final model.

500

501 *Image segmentation inference.* Once a model completes training, it is capable of predicting the  
502 functional zonation on the tissue from its RGB images. On the inference, RESEPT performs  
503 scGNN with the same parameter combinations with the training settings resulting in 56 candidate  
504 RGB images for each input sample. RESEPT infers all the segmentation maps on these 56  
505 images and scores them using the Moran's I metric (details in **Supplementary Fig. 9**) to assess  
506 the quality of segmentations. The segmentation maps of 5-top ranked images in terms of Moran's  
507 I are returned for user selection. We found that such a quality assessment protocol results in  
508 segmentation results with higher accuracy than the default one and enhances the robustness of  
509 RESEPT.

510

## 511 **2 Data analysis**

### 512 **2.1 Experiment preparation, data generation, and processing**

513 *Experiment preparation and data generation.* Four postmortem human brain samples of the  
514 middle temporal gyrus<sup>16</sup> were obtained from the Arizona Study of Aging and Neurodegenerative  
515 Disorders/Brain and Body Donation Program at Banner Sun Health Research Institute<sup>37</sup> and the  
516 New York Brain Bank at Columbia University Medical Center<sup>38</sup>. Two of them are from non-AD  
517 cases at Braak stage I-II, namely Samples S2 and S5 in the study, and the other two are from  
518 early-stage AD cases at Braak stage III-IV, namely Samples S4 and S3 in the study. The region  
519 of AD cases was chosen based on the presence of A $\beta$  plaques and neurofibrillary tangles. The  
520 10x Genomics Visium Spatial Transcriptome experiment was performed according to the User  
521 Guide of 10x Genomics Visium Spatial Gene Expression Reagent Kits (CG00239 Rev D). All the  
522 sections were sectioned into 10  $\mu$ m thick and mounted directly on the Visium Gene Expression  
523 (GE) slide for H&E staining and the following cDNA library construction for RNA-Sequencing.  
524 Besides the section mounted on the GE slide, one of the adjacent sections (20  $\mu$ m away from GE  
525 section) from AD samples persevered for the A $\beta$  immunofluorescence staining. The method of  
526 immunofluorescence staining of A $\beta$  on persevered section was the same as previously  
527 described<sup>20</sup>. The image of A $\beta$  staining was used as the ground truth and was aligned to H&E  
528 staining on GE slides using the "Transform/Landmark correspondences" plugin in ImageJ<sup>39</sup>.

529

530 *FASTQ generation, alignment, and count.* BCL files were processed by sample with the  
531 SpaceRanger (v.1.2.2) to generate FASTQ files via `spaceranger mkfastq`. The FASTQ file was  
532 then aligned and quantified based on the reference GRCh38 Reference-2020-A via `spaceranger`

533 count. The functions *spaceranger mkfastq* and *spaceranger count* were used for demultiplexing  
 534 sample and transcriptome alignment via the default parameter settings.

535  
 536 **Table 1: Details of 10x Visium data used in the study.** The table lists 17 samples of information. The Sample  
 537 column indicates the sample number in this study. The Protocol column indicates the revision number of  
 538 two Visium protocols. The Tissue column indicates the sample disease's status. The # of spot column  
 539 indicates the number of spots. The Mean reads column indicates the number of reads for each spot from  
 540 the bam file. The Median gene column indicates the median number of detected genes for each spot. The  
 541 Total reads column indicates the total number of each sample calculated from the expression matrix. The  
 542 Mean reads column indicates the mean read of each spot from the expression matrix. The SD reads column  
 543 indicates the standard deviation of each spot calculated from the expression matrix. Abbreviations:  
 544 Alzheimer's disease (AD), CG000239 -Visium Spatial Gene Expression Reagent Kits- User Guide Rev D,  
 545 Oct.2020 (Rev D), CG000239 -Visium Spatial Gene Expression Reagent Kits- User Guide Rev A, Nov.  
 546 2019 (Rev A).

| Sample | Protocol | Tissue       | Web reported |            |             | Expression matrix |            |           |
|--------|----------|--------------|--------------|------------|-------------|-------------------|------------|-----------|
|        |          |              | #spot        | Mean reads | Median gene | Total reads       | Mean reads | SD reads  |
| S1     | Rev D    | Tumor        | 3,468        | 11,596     | 4,326       | 43,841,318        | 12,641.670 | 7,204.035 |
| S2     | Rev D    | Health brain | 4,701        | 42,484     | 3,022       | 43,225,942        | 9,195.053  | 8,771.039 |
| S3     | Rev D    | AD           | 3,445        | 36,569     | 3,722       | 30,383,719        | 8,819.657  | 4,275.528 |
| S4     | Rev D    | AD           | 4,832        | 33,660     | 3,664       | 41,180,024        | 8,522.356  | 4,789.882 |
| S5     | Rev D    | health brain | 4,225        | 43,186     | 3,458       | 33,815,249        | 8,003.609  | 3,527.456 |
| S6     | Rev A    | health brain | 3,672        | 223,921    | 2,610       | 21,699,243        | 5,907.771  | 2,848.429 |
| S7     | Rev A    | Health brain | 3,641        | 82,583     | 2,113       | 16,701,265        | 4,589.520  | 2,356.537 |
| S8     | Rev A    | Health brain | 4,111        | 118,826    | 1,854       | 16,042,438        | 3,903.270  | 1,955.168 |
| S9     | Rev A    | Health brain | 3,459        | 92,729     | 1,813       | 13,391,960        | 3,870.509  | 1,931.687 |
| S10    | Rev A    | Health brain | 4,634        | 58,483     | 1,344       | 13,823,583        | 3,775.904  | 1,920.972 |
| S11    | Rev A    | Health brain | 4,021        | 69,839     | 1,742       | 14,590,115        | 3,633.902  | 1,789.643 |
| S12    | Rev A    | Health brain | 3,592        | 65,000     | 1,695       | 12,923,757        | 3,597.928  | 1,988.986 |
| S13    | Rev A    | Health brain | 3,499        | 65,523     | 1,607       | 12,007,005        | 3,432.534  | 1,772.158 |
| S14    | Rev A    | Health brain | 4,226        | 76,928     | 1,384       | 10,955,668        | 2,592.444  | 1,198.877 |
| S15    | Rev A    | Health brain | 4,787        | 58,813     | 1,407       | 12,243,054        | 2,556.495  | 1,250.268 |
| S16    | Rev A    | Health brain | 3,662        | 91,654     | 1,736       | 11,356,262        | 2,450.639  | 1,150.815 |
| S17    | Rev A    | Health brain | 4,383        | 60,244     | 1,159       | 9,325,211         | 2,127.101  | 1,046.434 |

547

## 548 2.2 Data preprocessing

549 To standardize the raw gene expression matrix and spot metadata, the different spatial  
550 transcriptomics data were preprocessed as follows.

551 For the 10x Visium data (**Table 1**), the filtered feature-barcode matrix (HDF5 file) was reshaped  
552 into a two-dimensional dense matrix in which rows represent spots and columns represent genes.  
553 The dense matrix was further added with spots' spatial coordinates by merging them with the  
554 'tissue\_positions\_list' file, containing tissue capturing information, row, and column coordinates.  
555 The mean color values of the RGB channels for each spot's circumscribed square and annotation  
556 label were also added to the dense matrix after processing the Hematoxylin-Eosin (H&E) image.  
557 The gene expression as part of the dense matrix was stored in a sparse matrix format. Other  
558 information describing the spots' characteristics was stored as individual metadata.

559 For the HDST data, the expression matrix and spots' coordinates were reshaped into the dense  
560 matrix, which was similar to 10x Visium preprocessing. The expression matrices from dense  
561 matrices were formed into the individual sparse matrices, and other information was stored as  
562 metadata.

563 For the ST data, the expression matrix was reshaped into the two-dimensional dense matrix, and  
564 spots' spatial coordinates were added to the dense matrix by merging with the  
565 spot\_data\_selection file. The color values of each spot were added to the dense matrix after  
566 processing the H&E image (if available). The remaining steps were the same as for the 10x Visium  
567 data.

568

### 569 **2.3 Data normalization and denoising**

570 *Data normalization.* The raw read counts were used as formatted input to generate normalization  
571 matrices. Seven normalization methods were used in the study, including DEseq2<sup>40</sup> (v.1.30.1),  
572 scran<sup>41</sup> (v.1.18.5), sctransform<sup>42</sup> (v.0.3.2), edgeR<sup>43</sup> (v.3.32.1), transcripts per million (TPM), reads  
573 per kilobase per million reads (RPKM), and log-transformed counts per million reads<sup>44</sup> (logCPM).  
574 We used Seurat (v.4.0.1) to generate the sctransform and the logCPM normalized matrices.  
575 edgeR was used to generate TMM<sup>43</sup> normalized matrices. The gene length was used for  
576 calculating TPM, and RPKM was obtained from biomaRt (v.2.46.3) by using *useEnsemble*  
577 function and parameters setting as dataset="hsapiens\_gene\_ensembl" and GRCh=38. All  
578 normalized matrices for whole transcriptomics were eventually calculated via the following default  
579 settings and converted into sparse matrices. RNA velocity was calculated for the whole  
580 transcriptomics via velocity<sup>17</sup> (v.0.17.17) and scVelo<sup>18</sup> (v.0.1) followed by their default settings.  
581 RNA velocity matrices were converted into sparse matrices.

582

583 *Missing spots imputation.* In practice, several spots may have missing expression in some tissue  
584 slices due to imperfect technology, which leads to blank tiles at the locations of these spots on  
585 the RGB images. Such blank tiles as incompatible noises may skew the following boundary  
586 recognition of spatial architecture. We assume the near neighbors are more likely to have similar  
587 values to the missing spot and impute these missing spots by applying the weighted average to  
588 the pixels of their valid six neighboring spots. Since these missing spots are colored while in  
589 default as the same with the background out of tissue, we need to distinguish them from all-white  
590 pixels according to a topological structural analysis<sup>45</sup>. Firstly, all contours (including outer contours  
591 of tissue and inner contours caused by missing spots) of tissue are detected from the border  
592 following procedure<sup>45</sup>. The contour with the largest area is determined as the outer contour of  
593 tissue. Then, all pixels in white inside the tissue contour are replaced by imputation from their  
594 neighbors. Given missing spot coordinates, we search their nearest  $k$  valid spots  $s_i$  ( $i=1, 2, \dots, k$ )  
595 to calculate the imputation value  $x_s$  of target missing spot  $s$  as:

$$596 \quad x_s = \sum_{i=1}^k \text{softmax}\left(\frac{1}{\text{dis}(s_i, s)}\right) \times s_i \quad (8)$$

597 where  $\text{dis}(s_i, s)$  represents the Euclidean distance between target spot  $s$  and a certain neighbor  
598  $s_i$  in spatial space. The softmax function normalizes all distance reciprocals of  $s$  and its  $k$  (we set  
599  $k=6$  by default) neighbors  $s_i$  to the weights ranging from 0 to 1. The imputation of  $s$  is the weighted  
600 average on all  $s_i$ . If a tissue slice is detected without missing spots, RESEPT skips this imputation  
601 process.

602

603 *Parameter setting.* Parameters in scGNN to generate embedding are referred to in the previous  
604 study<sup>13</sup>. In the case study of the AD sample, in analysis on cortical layers 2 & 3, the expressions  
605 of 8 well-defined marker genes were log-transformed and embedded by spaGCN with 0.65  
606 resolution. In the analyses of cortical layer 2 to layer 6, PCA ( $n.PCs=3$ ) was firstly utilized to  
607 extract the principal components of their expressions of marker genes for highlighting the  
608 dominant signals, and then they were embedded by spaGCN with 0.65 resolution. In the  
609 exploration of tumor regions in glioblastoma samples, their marker gene expressions were  
610 preprocessed by logCPM normalization and PCA ( $n.PCs=50$ ). The processed data was  
611 embedded by spaGCN with 0.35 resolution. In the analyses of AD-associated critical cell types,  
612 marker gene expressions were preprocessed by log-transform and PCA ( $n.PCs=3$ ) as well and  
613 then embedded by spaGCN with 0.65 resolution. For investigating A $\beta$  pathological regions, log-

614 transform to the expressions of validated 20 upregulated genes was applied, and their embedding  
615 was generated by spaGCN with 0.65 resolution.

### 616 **3 Benchmarking evaluation**

617 All the benchmarking tasks were run on a Red Hat Enterprise Linux 8 system with 13 T storage,  
618 2x AMD EPYC 7H12 64-Core Processor, 1TB RAM 1TB DDR4 3200MHz RAM, and 2x NVIDIA  
619 A100 GPU with 40GB RAM. The usage of the existing tools and their parameter settings in our  
620 benchmarking evaluation were described below.

621 *Seurat (v.4.0.1)* identifies tissue architecture based on graph-based clustering algorithms (e.g.,  
622 Louvain algorithm). Creating Seurat object, identification of highly variable features, and scaling  
623 of the data was performed using default parameters. The PCs were set to 128 to match our  
624 framework default setting. The *FindNeighbors* and *FindClusters* functions with default parameters  
625 were used for tissue architecture identification. To further evaluate the robustness of the  
626 combination of the different parameters, we used 16 samples and selected three important  
627 parameters, including the number of PCs (dims = 10, 32, and 64), the value of  $k$  for the  
628 *FindNeighbor* function ( $k.parm = 20, 50$  and  $100$ ), and the resolution in the *FindClusters* function  
629 ( $res = 0.1$  to  $1$ , step as  $0.1$ ).

630 *BayesSpace (v.1.0.0)* identifies tissue architecture based on the Gaussian mixture model  
631 clustering and Markov Random Field at an enhanced resolution of spatial transcriptomics data.  
632 Creating the *SingleCellExperiment* object is implemented to the following analysis by loading  
633 normalized expression data and position information for barcodes. Then, we set 128 as the  
634 number of PCs in *spatialPreprocess* function and parameter *log.normalize* was set FALSE due to  
635 the normalized data input. Lastly, tissue architecture was identified by running *qTune* and  
636 *spatialCluster* functions. We followed the official tutorial and adopted k-means as initial methods  
637 while other parameters were from the default based on prior information. In the process of  
638 assessing the robustness of BayesSpace, we set the cluster number as seven, the parameter  
639  $n.PCs$  in *spatialPreprocess* function ( $n.PCs = 10, 64, \text{ and } 128$ ), and the parameter  $nrep$  in  
640 *spatialCluster* function ( $nrep = 5000, 10000, \text{ and } 150000$ ) for 16 samples.

641 *SpaGCN (v.0.0.5)* can integrate gene expression, spatial location, and histology to identify spatial  
642 domains and spatially variable genes by graph convolutional network. SpaGCN was used to  
643 generate 3D embedding and tissue architecture and includes three procedures, including loading  
644 data, calculating adjacent matrix, and running SpaGCN. In the first step, both expression data  
645 and spatial location information were imported. Second, adjacent matrices were calculated using



646 default parameters. Lastly, we selected 128 PCs, the initial clustering algorithm as Louvain, and  
647 other parameters used default settings. To evaluate the robustness of the parameters and enable  
648 comparison with other tools, three parameters, the number of PCs (*num\_pcs* = 20, 30, 32, 40, 50,  
649 60, 64), the value of *k* for the *k*-nearest neighbor algorithm (*n\_neighbors* = 20, 30, and 40), and  
650 the resolution in the Louvain algorithm (*res* = 0.2, 0.3, and 0.4) for 16 samples were adjusted.

651 *stLearn* (v.0.3.2) is designed to comprehensively analyze ST data to investigate complex  
652 biological processes based on Deep Learning. *stLearn* highlights innovation to normalize data.  
653 Therefore, we input expression data, location information as well as images. *stLearn* consists of  
654 two steps, i.e., preparation and run *stSME* clustering. In preparation, loading data, filtering,  
655 normalization, log-transformation, preprocessing for spot image, and feature extraction were  
656 implemented. In the following module, PCA dimension reduction was set to 128 PCs, applying  
657 *stSME* to normalize log-transformed data and Louvain clustering on *stSME* normalized data using  
658 the default parameters. To evaluate the robustness of the parameters and enable comparison  
659 with other tools, three parameters were considered to be adjusted for 16 samples, the number of  
660 PCs (*n\_comps* = 10, 20, 30, 32, 40, and 50), the value of *k* for the *k*NN algorithm (*n\_neighbors* =  
661 10, 20, 30, 40, and 50), and the resolution in the Louvain algorithm (*resolution* = 0.7, 0.8, 0.9 and  
662 1).

663 *STUtility* (v0.1.0) can be used for the identification of spatial expression patterns alignment of  
664 consecutive stacked tissue images and visualizations. We implemented *STUtility* as a tissue  
665 architecture tool based on the Seurat framework. *RunNMF* was carried out as the dimension  
666 reduction method. The number of factors was set to 128 for matching our framework default  
667 setting. *FindNeighbors* and *FindClusters* were used to identify tissue architecture. To further  
668 evaluate the robustness of the combination of the different parameters, we used 16 samples and  
669 selected three important parameters for tuning, including the number of factors (*n\_factors* = 10, 32,  
670 and 64), the value of *k* for *FindNeighbor* function (*k.parm* = 20, 50, 100, 200, and 250), and the  
671 resolution in *FindClusters* function (*res* = 0.05, 0.1, 0.2, 0.3, 0.5, and 0.7, 0.9).

672 *Giotto* (v.1.0.3) is a comprehensive and multifunction computational tool for spatial data analysis  
673 and visualization. We implemented *Giotto* as the tissue architecture identification tool in this study  
674 via using default settings. *Giotto* first identified highly variable genes via *calculateHVG* function,  
675 then performed PCA dimension reduction using 128 PCs, constructed the nearest neighbor  
676 network via *createNearestNetwork*, and eventually identified tissue architecture via  
677 *doLeidenCluster*. To further evaluate the robustness of the combination of the different  
678 parameters, we used 16 samples and selected three important parameters for tuning, including

679 the number of PCs ( $npc = 10, 32, \text{ and } 64$ ), the value of  $k$  for *createNearestNetwork* function ( $k =$   
680  $20, 50 \text{ and } 100$ ), and the resolution in *doLeidenCluster* function ( $resolution = 0.1, 0.2, 0.3, 0.4,$   
681  $\text{ and } 0.5$ ).

682 *Downsampling simulation for read depth.* Comparing the mean and standard deviation of 16 10x  
683 Visium datasets, samples S5 and S6 were selected to generate simulation data with decreasing  
684 sequencing depth. Let matrix  $C$  be the  $N \times M$  expression count matrix, where  $N$  is the number  
685 of spots and  $M$  is the number of genes. Define the spot-specific sequencing depths  $c_i = \sum_{j=1}^M C_{ij}$ ,  
686 i.e., the column sums of  $C$ . Thus, the average sequencing depth of the experiment is  $\bar{c} = \frac{\sum_{i=1}^N c_i}{N}$ .  
687 Let  $t < \bar{c}$  be our target downsampled sequencing depth and let  $C^*$  be the  $N \times M$  downsampled  
688 matrix. We perform the downsampling as follows:

689 For each spot  $i = 1, \dots, N$ :

- 690 1) Define the total counts to be sampled in the spot  $i$  as  $t_i = \frac{t \times c_i}{\bar{c}}$ .
- 691 2) Construct the character vector of genes to be sampled as  $G_i =$   
692  $\{\underbrace{1, \dots, 1}_{c_{i1}}, \underbrace{2, \dots, 2}_{c_{i2}}, \dots, \underbrace{M, \dots, M}_{c_{iM}}\}$ .
- 693 3) Sample  $t_i$  elements from  $G_i$  without replacement and define  $N_j$  as the number of times  
694 gene  $j$  was sampled from  $G_i$  for  $j = 1, \dots, M$ .
- 695 4) Let  $C_{ij}^* = N_j$ .

696 Using this method, the average downsampled sequencing depth is:

$$697 \bar{C}^* = \frac{\frac{t}{\bar{c}}c_1 + \frac{t}{\bar{c}}c_2 + \dots + \frac{t}{\bar{c}}c_n}{N} = \frac{t}{\bar{c}} \frac{\sum_{i=1}^N c_i}{N} = \frac{t}{\bar{c}} \times \bar{c} = t,$$

698 as desired. Note also that this method preserves the relative total counts of each spot, i.e., spots  
699 that had higher sequencing depths in the original matrix have proportionally higher depths in the  
700 downsampled matrix.

701

## 702 **4 Evaluation metrics**

### 703 **4.1 Benchmark performance evaluation criteria**

704 Adjusted Rand Index (ARI), Rand index (RI), Fowlkes–Mallows index (FM), and Adjusted mutual  
705 information (AMI) are used to evaluate the performances between the ground truth and predicted  
706 results.

707

708 Adjusted Rand index (ARI) measures the agreement between two partitions. Given a set  $S$   
709 consisting of  $n$  elements,  $\mathcal{F}_1 = \{X_1, X_2, \dots, X_r\}$  and  $\mathcal{F}_2 = \{Y_1, Y_2, \dots, Y_s\}$  are two partitions of  $S$ ; that  
710 is,  $S = \cup_i X_i$  and  $X_i \cap X_j = \emptyset$ , so does  $\mathcal{F}_2$ .  $X_i$  can be interpreted as a cluster generated by some  
711 clustering method. In this way, ARI can be described as follow:

$$712 \quad ARI = \frac{\sum_{ij} \binom{n_{ij}}{2} - [\sum_i \binom{a_i}{2} \sum_j \binom{b_j}{2}] / \binom{n}{2}}{\frac{1}{2} [\sum_i \binom{a_i}{2} + \sum_j \binom{b_j}{2}] - [\sum_i \binom{a_i}{2} \sum_j \binom{b_j}{2}] / \binom{n}{2}} \quad (9)$$

713 where  $n_{ij} = X_i \cap Y_j$ , denotes the number of objects in common between  $X_i$  and  $Y_j$ ;  $a_i = \sum_j n_{ij}$  and  
714  $b_j = \sum_i n_{ij}$ . Besides,  $ARI \in [-1, 1]$ , the higher  $ARI$  reflects the higher consistency. The bs function  
715 of the splines package (v.4.0.3) was used for smoothing ARI generated from grid effective  
716 sequencing depth data via default settings.

717 **Rand index (RI)** is also a measure of the similarity between two data clustering results. If the  
718 ground truth is available, the  $R$  can be used to evaluate the performance of one cluster method  
719 by calculating  $R$  between the clustering produced by this method and the ground truth. Let  $S$  be a  
720 set containing  $n$  elements, which represents  $n$  barcodes in this paper, and two partitions of  $S$ ,  
721  $\mathcal{F}_1 = \{X_1, X_2, \dots, X_r\}$ ,  $\mathcal{F}_2 = \{Y_1, Y_2, \dots, Y_s\}$ ; that is,  $S = \cup_i X_i$  and  $X_i \cap X_j = \emptyset$ ; so does  $\mathcal{F}_2$ .  $X_i$  and  $Y_j$   
722 are the subset of  $S$ , representing one cluster produced by some clustering method and the ground  
723 truth, respectively.  $R$  can be computed using the following formula:

$$724 \quad RI = \frac{a + b}{a + b + c + d} = \frac{a + b}{\binom{n}{2}} \quad (10)$$

725 where:

- 726 •  $a, b, c, d$  denote the number of pairs of elements in  $S$  in the same subset in  $\mathcal{F}_1$  and in the  
727 same subset in  $\mathcal{F}_2$ , in different subsets in  $\mathcal{F}_1$  and in different subsets in  $\mathcal{F}_2$ , in the same subset  
728 in  $\mathcal{F}_1$  and in different subsets in  $\mathcal{F}_2$ , and in different subsets in  $\mathcal{F}_1$  and in the same subset in  
729  $\mathcal{F}_2$ , respectively.
- 730 •  $\binom{n}{2}$  is the binomial coefficient. In addition, the range of  $RI$  is  $[0,1]$ , and the higher  $RI$ , the  
731 higher similarity of two partitions is.

732

733 **The Fowlkes–Mallows index (FM)** is an external evaluation method, which can measure the  
734 results' consistency of two cluster algorithms. Not only can FM be implemented on two  
735 hierarchical clusterings, but also the clusters and the benchmark classifications. For the set  $S$  of  
736  $n$  objects,  $A_1$  and  $A_2$  denote two clustering results (generated by two cluster algorithms or one for

737 cluster algorithm, one for the ground truth). In this paper,  $A_1$  is produced by a clustering algorithm  
 738 while the ground truth contributes  $A_2$ . If the clustering algorithm performs well, then  $A_1$  and  $A_2$   
 739 should be as similar as possible. The calculation of FM can be described as:

$$740 \quad FM = \sqrt{PPV \cdot TPR} = \sqrt{\frac{TP}{TP + FP} \cdot \frac{TP}{TP + FN}} \quad (11)$$

741 where

- 742 • TP is the number of true positives, representing the number of pair objects that are present  
 743 in the same cluster in both  $A_1$  and  $A_2$ .
- 744 • FP is the number of false positives, representing the number of pair objects that are present  
 745 in the same cluster in  $A_1$  but not in  $A_2$ .
- 746 • TN is the number of false negatives, representing the number of pair objects that are present  
 747 in the same cluster in  $A_2$  but not in  $A_1$ .
- 748 • PPV is so-called precision while  $TPR$  refers to recall. In addition,  $FM \in [0, 1]$ . Therefore, in our  
 749 cases, the closer it is to 1, the better the clustering algorithm will be.

750

751 **Adjusted mutual information (AMI)** is driven from probability theory and information theory and  
 752 can be used for comparing clustering results. To introduce adjusted mutual information, the  
 753 preliminary is necessary to present two conceptions mutual information (MI) and entropy. Given  
 754 a set  $S = \{s_1, s_2, \dots, s_n\}$ ,  $\mathcal{F}_1 = \{X_1, X_2, \dots, X_r\}$  and  $\mathcal{F}_2 = \{Y_1, Y_2, \dots, Y_s\}$  are two partitions of  $S$ , that is,  
 755  $S = \cup_i X_i$  and  $X_i \cap X_j = \emptyset$ , so does  $\mathcal{F}_2$ . MI between partition  $\mathcal{F}_1$  and  $\mathcal{F}_2$  is defined as:

$$756 \quad MI((\mathcal{F}_1, \mathcal{F}_2)) = \sum_{i=1}^r \sum_{j=1}^s P_{\mathcal{F}_1 \mathcal{F}_2}(i, j) \log P_{\mathcal{F}_1 \mathcal{F}_2}(i, j) \quad (12)$$

757 where

$$758 \quad P_{\mathcal{F}_1 \mathcal{F}_2}(i, j) = \frac{|X_i \cap Y_j|}{n}$$

759

760 measures the probability of one object belonging to  $X_i$  and  $Y_j$  simultaneously.

761 The entropy associated with the partitioning  $\mathcal{F}_1$  is defined as:

$$762 \quad H(\mathcal{F}_1) = - \sum_{i=1}^n P_{\mathcal{F}_1}(i) \log P_{\mathcal{F}_1}(i), \quad P_{\mathcal{F}_1}(i) = \frac{X_i}{n} \quad (13)$$

763 where

- 764 •  $P_{\mathcal{F}_1}(i)$  refers to the probability that the object falls into the cluster  $X_i$ .

765 •  $H(\mathcal{F}_2)$  and  $P_{\mathcal{F}_2}(j)$  have analogous definitions.

766 The following formula shows the expected mutual information between two random clustering  
767 results:

$$768 \quad E\{MI(\mathcal{F}_1, \mathcal{F}_2)\} = \sum_{i=1}^r \sum_{j=1}^s \sum_{n_{ij}=(a_i+b_j-n)^+}^{\min(a_i, b_j)} \frac{n_{ij}}{n} \log \left( \frac{nn_{ij}}{a_i b_j} \right) \times$$

$$769 \quad \frac{a_i! b_j! (n - a_i)! (n - b_j)!}{n! n_{ij}! (a_i - n_{ij})! (b_j - n_{ij})! (n - a_i - b_j - n_{ij})!} \quad (14)$$

770 where  $(a_i + b_j - n)^+ = \max(1, a_i + b_j - n)$ ;  $a_i = \sum_j n_{ij}$  and  $b_j = \sum_i n_{ij}$ ,  $n_{ij} = X_i \cap Y_j$ , represents  
771 the number of objects in common between  $X_i$  and  $Y_j$ . Finally, AMI can be obtained by

$$772 \quad AMI(\mathcal{F}_1, \mathcal{F}_2) = \frac{MI(\mathcal{F}_1, \mathcal{F}_2) - E\{MI(\mathcal{F}_1, \mathcal{F}_2)\}}{\max(H(\mathcal{F}_1), H(\mathcal{F}_2)) - E\{MI(\mathcal{F}_1, \mathcal{F}_2)\}} \quad (15)$$

773 It should be pointed out that  $AMI \in [0, 1]$ , the similarity between the two clusterings increases with  
774 the augment of AMI.

775

## 776 4.2 RGB image and 3D embedding evaluation

777 We modified the metric peak signal-to-noise ratio (PSNR)<sup>46</sup>, whose original version is commonly  
778 used to measure the reconstruction loss of image compression, to assess the similarity between  
779 the color distribution of an RGB image and its corresponding labeled segmentation map. We re-  
780 used its basic concept to calculate the PSNR from each labeled segment, and then applied  
781 weighted sum to the PSNRs from all  $p$  segments according to their area:

$$782 \quad PSNR = \frac{\sum_{i=1}^p PSNR_i \times a_i}{\sum_{i=1}^p a_i} = \frac{\sum_{i=1}^p 10 \log_{10} \left( \frac{MAX_i^2}{MSE_i} \right) \times a_i}{\sum_{i=1}^p a_i} \quad (16)$$

783 where:

- 784 •  $a_i$  is the number of pixels located in the  $i^{th}$  segment,  $1 \leq i \leq p$
- 785 •  $MAX_i$  is the maximum pixel-value of the  $i^{th}$  segment,  $0 \leq MAX \leq 255$
- 786 •  $MSE_i$  is the pixel-wise mean squared error of the  $i^{th}$  segment.

787 The larger PSNR implies the better the RGB image can indicate the labeled spatial architectures,  
788 and further demonstrates the better quality its corresponding 3-dimensional embeddings achieve.

## 789 4.3 Predicted Segmentation Map Quality assessment.

790 Differed from the Moran's I auto-correlation index<sup>36</sup> using for revealing a single gene's spatial  
791 auto-correlation, we modified Moran's I in Geo-spatiality<sup>47</sup> to evaluate a predictive segmentation  
792 map without known ground truth. The metric analyzes the heterogeneity of predictive inter-  
793 segments by measuring the pixel contrast cross any two predicted adjacent segments per  
794 channel:

$$795 \quad \text{Moran's } I = \sqrt{\frac{\sum_{c=1}^3 N \sum_{i=1}^N \sum_{j=1}^N a_{ij} |(y_i - \bar{y})(y_j - \bar{y})|}{3 \times (\sum_{i=1}^N (y_i - \bar{y})^2) (\sum_{i \neq j} a_{ij})}} \quad (17)$$

796 where

- 797 •  $a_{ij}$  is the binary spatial adjacency of the  $i^{\text{th}}$  segment and  $j^{\text{th}}$  segment.  $1 \leq i \leq N, 1 \leq j \leq N$
- 798 •  $y_{i,c} \in \mathbb{R}^3$  denotes the mean pixel values at  $c^{\text{th}}$  channels in Red, Green and Blue of the  $i^{\text{th}}$   
799 segment,  $1 \leq c \leq 3$ ,
- 800 •  $\bar{y}_c \in \mathbb{R}^3$  denotes the mean pixel values at channel Red, Green and Blue of the whole image.

801

#### 802 **4.4 Module score calculation and differential expression analysis.**

803 The module score for specific marker genes was calculated based on the Seurat function  
804 *AddModuleScore*, which calculated the average expression levels of genes for specific spot  
805 groups. The DEG analysis was conducted by the Seurat function *FindAllMarkers* based on  
806 RESEPT predicted seven segments via default settings. Based on the identified DEGs, the  
807 enrichment analyses of GO terms (Biological Process) and KEGG were performed via the R  
808 package *clusterProfile* (v.3.18.0) using the functions of *enrichGO* and *enrichKEGG*. The  
809 enrichment analysis results were filtered out if the adjusted p-value was greater than 0.05. For  
810 KEGG analysis, gene database *Org.Hs.eg.Db* was used for transferring SYMBOL to ENREZID  
811 via function *bitr*. R package *ggplot2* (v.3.3.2) was used for the visualizations.

812

#### 813 **Data availability**

814 The 10x Visium datasets (10 from Spatial Gene Expression 1.0.0; 14 from Spatial Gene  
815 Expression 1.1.0, 13 from Spatial Gene Expression 1.2.0; including S1) can be accessed from  
816 <https://www.10xgenomics.com/products/spatial-gene-expression>. Our own AD datasets (S2-S5)  
817 are available from Dr. Hongjun Fu upon request. The datasets (S6-S17) used for training model  
818 and benchmarking can be accessed via endpoint "jhpce#HumanPilot10x" on Globus data transfer  
819 platform at <http://research.libd.org/globus/>. The HDST datasets are available as accession

820 number SCP420 in the Single Cell Portal via link [https://singlecell.broadinstitute.org/single\\_cell](https://singlecell.broadinstitute.org/single_cell).  
821 The ST and 10x Visium data (squamous cell carcinoma) can be accessed from the GEO database  
822 with an accession number GSE144239. More details of datasets can be found in Supplementary  
823 Table 1.

824

### 825 **Code availability**

826 RESEPT is freely available as an open-source Python package at [https://github.com/OSU-](https://github.com/OSU-BMBL/RESEPT)  
827 [BMBL/RESEPT](https://github.com/OSU-BMBL/RESEPT).

828

### 829 **Contributions**

830 Conceptualization: D.X. and Q.M.; methodology: F.H, J.W., Y.C., Q.M. and D.X.; software coding:  
831 F.H, Y.C, J.L, Y.Y, L.S., J.W. and L.Y.; data collection and investigation: Y.C., S.C. and L.S.; data  
832 generation: S.S.; data analysis and visualization: Y.C., F.H, J.L., Y.Y., J-X.L, L.S., S.C., Y.L. and  
833 A.M.; AD result interpretation: H.F.; Glioblastoma result interpretation: J.O.; software testing and  
834 tutorial: Y.Y.; Simulation: C.A. and D.C.; manuscript writing, review, and editing: J.W., Y.C., F.H.,  
835 B.L., C.A., D.C., Z.L., D.X., C.A., D.C. and Q.M.

836

### 837 **Acknowledgements**

838 This work was supported by awards R35-GM126985 and R01-GM131399 from the National  
839 Institute of General Medical Sciences and awards K01-AG056673 and R56-AG066782-01 from  
840 the National Institute on Aging of the National Institutes of Health. The work was also supported  
841 by award NSF1945971 from the National Science Foundation and the award of AARF-17-505009  
842 from the Alzheimer's Association. We thank Hua Li and Shiyuan Chen from Stowers Institute,  
843 Liangping Li from the Ohio State University for helpful discussion, and Paul Toth from Ohio State  
844 University for polishing the manuscript. Human de-identified brain tissues were kindly provided  
845 by the Banner Sun Health Research Institute Brain and Body Donation Program, supported by  
846 NIH grants U24-NS072026 and P30-AG19610 (TGB), the Arizona Department of Health Services  
847 (contract 211002, Arizona Alzheimer's Research Center), the Arizona Biomedical Research  
848 Commission (contracts 4001, 0011, 05-901 and 1001 to the Arizona Parkinson's Disease  
849 Consortium) and the Michael J. Fox Foundation for Parkinson's Research and the New York  
850 Brain Bank at Columbia University Medical Center. This work used the high-performance  
851 computing infrastructure at the Ohio State University and the University of Missouri, as well as  
852 the Extreme Science and Engineering Discovery Environment (XSEDE), which is supported by  
853 the National Science Foundation grant number ACI-1548562.

## 854 **References**

- 855 1 Liao, J., Lu, X., Shao, X., Zhu, L. & Fan, X. Uncovering an Organ's Molecular Architecture  
856 at Single-Cell Resolution by Spatially Resolved Transcriptomics. *Trends in Biotechnology*,  
857 doi:10.1016/j.tibtech.2020.05.006 (2020).
- 858 2 Chen, W. T. *et al.* Spatial Transcriptomics and In Situ Sequencing to Study Alzheimer's  
859 Disease. *Cell* **182**, 976-991.e919, doi:10.1016/j.cell.2020.06.038 (2020).
- 860 3 Ji, A. L. *et al.* Multimodal Analysis of Composition and Spatial Architecture in Human  
861 Squamous Cell Carcinoma. *Cell* **182**, 497-514.e422, doi:10.1016/j.cell.2020.05.039  
862 (2020).
- 863 4 Method of the Year 2020: spatially resolved transcriptomics. *Nature Methods* **18**, 1-1,  
864 doi:10.1038/s41592-020-01042-x (2021).
- 865 5 Stuart, T. *et al.* Comprehensive Integration of Single-Cell Data. *Cell* **177**, 1888-1902  
866 e1821, doi:10.1016/j.cell.2019.05.031 (2019).
- 867 6 Dries, R. *et al.* Giotto: a toolbox for integrative analysis and visualization of spatial  
868 expression data. *Genome Biol* **22**, 78, doi:10.1186/s13059-021-02286-2 (2021).
- 869 7 Zhao, E. *et al.* Spatial transcriptomics at subspot resolution with BayesSpace. *Nat*  
870 *Biotechnol*, doi:10.1038/s41587-021-00935-2 (2021).
- 871 8 Pham, D. *et al.* stLearn: integrating spatial location, tissue morphology and gene  
872 expression to find cell types, cell-cell interactions and spatial trajectories within  
873 undissociated tissues. *bioRxiv*, 2020.2005.2031.125658, doi:10.1101/2020.05.31.125658  
874 (2020).
- 875 9 Hu, J. *et al.* Integrating gene expression, spatial location and histology to identify spatial  
876 domains and spatially variable genes by graph convolutional network. *bioRxiv*,  
877 2020.2011.2030.405118, doi:10.1101/2020.11.30.405118 (2020).
- 878 10 Stuart, T. *et al.* Comprehensive Integration of Single-Cell Data. *Cell* **177**, 1888-  
879 1902.e1821, doi:10.1016/j.cell.2019.05.031 (2019).
- 880 11 Dries, R. *et al.* Giotto: a toolbox for integrative analysis and visualization of spatial  
881 expression data. *Genome Biology* **22**, 78, doi:10.1186/s13059-021-02286-2 (2021).
- 882 12 Bergenstråhle, J., Larsson, L. & Lundeberg, J. Seamless integration of image and  
883 molecular analysis for spatial transcriptomics workflows. *BMC Genomics* **21**, 482,  
884 doi:10.1186/s12864-020-06832-3 (2020).
- 885 13 Wang, J. *et al.* scGNN is a novel graph neural network framework for single-cell RNA-Seq  
886 analyses. *Nat Commun* **12**, 1882, doi:10.1038/s41467-021-22197-x (2021).



- 887 14 He, K. M., Zhang, X. Y., Ren, S. Q. & Sun, J. Deep Residual Learning for Image  
888 Recognition. *Proc Cvpr leee*, 770-778, doi:10.1109/Cvpr.2016.90 (2016).
- 889 15 Maynard, K. R. *et al.* Transcriptome-scale spatial gene expression in the human  
890 dorsolateral prefrontal cortex. *Nature Neuroscience* **24**, 425-436, doi:10.1038/s41593-  
891 020-00787-0 (2021).
- 892 16 Chen, S. *et al.* Spatially resolved transcriptomics reveals unique gene signatures  
893 associated with human temporal cortical architecture and Alzheimer's pathology. *bioRxiv*,  
894 2021.2007.2007.451554, doi:10.1101/2021.07.07.451554 (2021).
- 895 17 La Manno, G. *et al.* RNA velocity of single cells. *Nature* **560**, 494-498,  
896 doi:10.1038/s41586-018-0414-6 (2018).
- 897 18 Bergen, V., Lange, M., Peidli, S., Wolf, F. A. & Theis, F. J. Generalizing RNA velocity to  
898 transient cell states through dynamical modeling. *Nature Biotechnology* **38**, 1408-1414,  
899 doi:10.1038/s41587-020-0591-3 (2020).
- 900 19 Maynard, K. R. *et al.* Transcriptome-scale spatial gene expression in the human  
901 dorsolateral prefrontal cortex. *Nature neuroscience* **24**, 425-436 (2021).
- 902 20 Fu, H. J. *et al.* A tau homeostasis signature is linked with the cellular and regional  
903 vulnerability of excitatory neurons to tau pathology. *Nature Neuroscience* **22**, 47-+,  
904 doi:10.1038/s41593-018-0298-7 (2019).
- 905 21 Jiang, J., Wang, C., Qi, R., Fu, H. & Ma, Q. scREAD: A single-cell RNA-Seq database for  
906 Alzheimer's Disease. *Iscience* **23**, 101769 (2020).
- 907 22 Stupp, R. *et al.* Radiotherapy plus concomitant and adjuvant temozolomide for  
908 glioblastoma. *N Engl J Med* **352**, 987-996, doi:10.1056/NEJMoa043330 (2005).
- 909 23 Zagzag, D. *et al.* Hypoxia- and vascular endothelial growth factor-induced stromal cell-  
910 derived factor-1alpha/CXCR4 expression in glioblastomas: one plausible explanation of  
911 Scherer's structures. *Am J Pathol* **173**, 545-560, doi:10.2353/ajpath.2008.071197 (2008).
- 912 24 Steponaitis, G. *et al.* High CHI3L1 expression is associated with glioma patient survival.  
913 *Diagnostic pathology* **11**, 42-42, doi:10.1186/s13000-016-0492-4 (2016).
- 914 25 Couturier, C. P. *et al.* Single-cell RNA-seq reveals that glioblastoma recapitulates a normal  
915 neurodevelopmental hierarchy. *Nature Communications* **11**, 3406, doi:10.1038/s41467-  
916 020-17186-5 (2020).
- 917 26 Darmanis, S. *et al.* Single-Cell RNA-Seq Analysis of Infiltrating Neoplastic Cells at the  
918 Migrating Front of Human Glioblastoma. *Cell Rep* **21**, 1399-1410,  
919 doi:10.1016/j.celrep.2017.10.030 (2017).

- 920 27 Zhong, E. D., Bepler, T., Berger, B. & Davis, J. H. CryoDRGN: reconstruction of  
921 heterogeneous cryo-EM structures using neural networks. *Nat Methods* **18**, 176-185,  
922 doi:10.1038/s41592-020-01049-4 (2021).
- 923 28 Chen, L. C., Papandreou, G., Schroff, F. & Adam, H. Rethinking Atrous Convolution for  
924 Semantic Image Segmentation. (2017).
- 925 29 Chen, L. C., Zhu, Y., Papandreou, G., Schroff, F. & Adam, H. J. S., Cham. Encoder-  
926 Decoder with Atrous Separable Convolution for Semantic Image Segmentation. (2018).  
927 30 in *IEEE Conference on Computer Vision & Pattern Recognition*.
- 928 31 Glorot, X., Bordes, A. & Bengio, Y. in *Proceedings of the Fourteenth International  
929 Conference on Artificial Intelligence and Statistics Vol. 15* (eds Gordon Geoffrey, Dunson  
930 David, & Dudík Miroslav) 315--323 (PMLR, Proceedings of Machine Learning Research,  
931 2011).
- 932 32 Grave, E., Joulin, A., Cissé, M., Grangier, D. & Jégou, H. Efficient softmax approximation  
933 for GPUs. (2016).
- 934 33 de Boer, P.-T., Kroese, D. P., Mannor, S. & Rubinstein, R. Y. A Tutorial on the Cross-  
935 Entropy Method. *Annals of Operations Research* **134**, 19-67, doi:10.1007/s10479-005-  
936 5724-z (2005).
- 937 34 Xu, J. a. C., Kai and Lin, Dahua. MMSegmenation. [https://github.com/open-](https://github.com/open-mmlab/mmlab/mmlab/mmsegmentation)  
938 [mmlab/mmsegmentation](https://github.com/open-mmlab/mmlab/mmlab/mmsegmentation) (2020).
- 939 35 Zonca, F., Chen, L. & Santoro, R. A. parallelized stochastic gradient descent. (1996).
- 940 36 Li, H., Calder, C. A. & Cressie, N. Beyond Moran's I: testing for spatial dependence based  
941 on the spatial autoregressive model. *Geographical Analysis* **39**, 357-375 (2007).
- 942 37 Beach, T. G. *et al.* Arizona Study of Aging and Neurodegenerative Disorders and Brain  
943 and Body Donation Program. *Neuropathology* **35**, 354-389, doi:10.1111/neup.12189  
944 (2015).
- 945 38 Vonsattel, J. P., Del Amaya, M. P. & Keller, C. E. Twenty-first century brain banking.  
946 Processing brains for research: the Columbia University methods. *Acta Neuropathol* **115**,  
947 509-532, doi:10.1007/s00401-007-0311-9 (2008).
- 948 39 Schneider, C. A., Rasband, W. S. & Eliceiri, K. W. NIH Image to ImageJ: 25 years of image  
949 analysis. *Nat Methods* **9**, 671-675, doi:10.1038/nmeth.2089 (2012).
- 950 40 Love, M. I., Huber, W. & Anders, S. Moderated estimation of fold change and dispersion  
951 for RNA-seq data with DESeq2. *Genome Biology* **15**, 550, doi:10.1186/s13059-014-0550-  
952 8 (2014).

- 953 41 Lun, A. T. L., McCarthy, D. J. & Marioni, J. C. A step-by-step workflow for low-level  
954 analysis of single-cell RNA-seq data with Bioconductor. *F1000Research* **5**, 2122-2122,  
955 doi:10.12688/f1000research.9501.2 (2016).
- 956 42 Hafemeister, C. & Satija, R. Normalization and variance stabilization of single-cell RNA-  
957 seq data using regularized negative binomial regression. *Genome Biology* **20**, 296,  
958 doi:10.1186/s13059-019-1874-1 (2019).
- 959 43 Robinson, M. D., McCarthy, D. J. & Smyth, G. K. edgeR: a Bioconductor package for  
960 differential expression analysis of digital gene expression data. *Bioinformatics* **26**, 139-  
961 140, doi:10.1093/bioinformatics/btp616 (2010).
- 962 44 Hao, Y. *et al.* Integrated analysis of multimodal single-cell data. *bioRxiv*,  
963 2020.2010.2012.335331, doi:10.1101/2020.10.12.335331 (2020).
- 964 45 Suzuki, S. Topological structural analysis of digitized binary images by border following.  
965 *Computer vision, graphics, and image processing* **30**, 32-46 (1985).
- 966 46 Huynh-Thu, Q. & Ghanbari, M. J. E. L. Scope of validity of PSNR in image/video quality  
967 assessment. **44**, 800-801 (2008).
- 968 47 Fotheringham, A. S., Brunsdon, C. F. & Charlton, M. E. Quantitative Geography:  
969 Perspectives on Modern Spatial Analysis. (2000).
- 970
- 971
